# Supplementary material for: Electrochemical sulfonylation of alkenes with sulfonyl hydrazides: a metal- and oxidant-free protocol for the synthesis of (E)-vinyl sulfones in water
Source: Royal Society of Chemistry journal article supplement (doi:10.1039/d0ra07212e), 2020-01-01

## Electrochemical sulfonylation of alkenes with sulfonyl hydrazides: a metal- and oxidant-free protocol for the synthesis of (*E*)-vinyl sulfones in water

Yin-Long Lai,<sup>†a</sup> Yunyan Mo,<sup>†a</sup> Shaoxi Yan,<sup>a</sup> Shengling Zhang,<sup>a</sup> Lejie Zhu,<sup>a</sup> Jianmin Luo,<sup>\*a</sup> Huishi Guo,<sup>\*a</sup> Jianpeng Cai,<sup>a</sup> Jianhua Liao<sup>\*b</sup>

<sup>a</sup> College of Chemistry and Civil Engineering, Shaoguan University, Shaoguan, 512005, Guangdong Province, P. R. China.

<sup>b</sup> School of Pharmaceutical Sciences, Gannan Medical University, Ganzhou, 341000, Jiangxi Province, P. R. China.

<sup>†</sup> These authors contributed equally.

E-mail: [xyyljm@163.com](mailto:xyyljm@163.com); [gold0226@126.com](mailto:gold0226@126.com); [liaojianhua715@163.com](mailto:liaojianhua715@163.com).

## Supporting Information

### Table of contents

|                                                                       |     |
|-----------------------------------------------------------------------|-----|
| 1. General information.....                                           | S2  |
| 2. General procedure for the optimization of reaction conditions..... | S3  |
| 3. General procedure for the vinyl sulfones.....                      | S4  |
| 4. The gram-scale synthesis of the product <b>3a</b> .....            | S4  |
| 5. Cyclic voltammograms.....                                          | S5  |
| 6. Spectroscopic data of products .....                               | S6  |
| 7. References .....                                                   | S13 |
| 8. Copies of NMR spectra of products .....                            | S14 |

## 1. General information

Unless otherwise noted, all solvents and reagents were obtained commercially and used without further purification. Analytical thin layer chromatography (TLC) plates and the silica gel (200–300 mesh) for column chromatography were phased from Qingdao Haiyang Chemical and Special Silica Gel Co, Ltd.

Proton nuclear magnetic resonance ( $^1\text{H}$  NMR) and carbon nuclear magnetic resonance ( $^{13}\text{C}$  NMR) spectroscopy were performed on Bruker Advance III-400 spectrometers (400 MHz for  $^1\text{H}$  NMR, 100 MHz for  $^{13}\text{C}$  NMR). Chemical shifts of  $^1\text{H}$  NMR and  $^{13}\text{C}$  NMR spectra were reported as in units of parts per million (ppm) downfield from  $\text{SiMe}_4$  ( $\delta$  0.0 ppm) and relative to the signal of chloroform- $d$  ( $\delta$  7.26 ppm for  $^1\text{H}$  NMR and  $\delta$  77.2 ppm for  $^{13}\text{C}$  NMR). Multiplicities were given as: s (singlet); br s (broad singlet); d (doublet); t (triplet); q (quartet); m (multiplets), etc. The number of protons (n) for a given resonance was indicated by nH.

Electrolysis reactions were conducted using a Model QJ3005T (32V) DC power supply purchased from Ningbo Jiuyuan Electronic Co., Ltd., China. Cyclic voltammetry (CV) analysis was performed on CHI660E electrochemical workstation (Shanghai Chenhua Instrument Co., Ltd., China), using a glassy carbon electrode (GCE) ( $d = 3$  mm) as working electrode, a Pt wire as counter electrode, and a saturated calomel electrode (SCE) as a reference electrode. Cyclic voltammograms were recorded at 100 mV/s scan rate. The pH value was performed on PHB-3 pH Pocket Tester (Shanghai San-Xin Co, Ltd., China).

## 2. General procedure for the optimization of reaction conditions

### 2.1 Catalyst screening

**Table S1** Catalyst screening <sup>a</sup>

| <b>1a</b> | <b>2a</b>                     |                          | <b>3a</b>              |
|-----------|-------------------------------|--------------------------|------------------------|
| Entry     | Catalyst                      | Catalyst loading (mol %) | Yield [%] <sup>b</sup> |
| 1         | <i>n</i> -Bu <sub>4</sub> NI  | 10                       | 88                     |
| 2         | NH <sub>4</sub> I             | 10                       | 77                     |
| 3         | KI                            | 10                       | 75                     |
| 4         | I <sub>2</sub>                | 5                        | 56                     |
| 5         | KIO <sub>3</sub>              | 10                       | 43                     |
| 6         | PhI(OAc) <sub>2</sub>         | 10                       | 48                     |
| 7         | <i>n</i> -Bu <sub>4</sub> NBr | 10                       | 68                     |
| 8         | <i>n</i> -Bu <sub>4</sub> NCl | 10                       | 54                     |
| 9         | <i>n</i> -Bu <sub>4</sub> NI  | 5                        | 79                     |

<sup>a</sup> Standard conditions: **1a** (0.5 mmol), **2a** (1.0 mmol), catalyst (10 mol %), sat. aq (NH<sub>4</sub>)<sub>2</sub>CO<sub>3</sub> (5.0 mL) as electrolyte, Pt foils (1.0 × 1.5 cm<sup>2</sup>) as anode and cathode, undivided cell, constant current = 40 mA, 3 h, room temperature. <sup>b</sup> The yield of the product was determined by <sup>1</sup>H NMR spectroscopy.

### 2.2 Electrolyte screening

**Table S2** Electrolyte screening <sup>a</sup>

| <b>1a</b> | <b>2a</b>                                               | <b>3a</b>              |
|-----------|---------------------------------------------------------|------------------------|
| Entry     | Electrolyte                                             | Yield [%] <sup>b</sup> |
| 1         | sat. aq (NH <sub>4</sub> ) <sub>2</sub> CO <sub>3</sub> | 88                     |
| 2         | sat. aq NH <sub>4</sub> HCO <sub>3</sub>                | 53                     |
| 3         | sat. aq (NH <sub>4</sub> ) <sub>3</sub> PO <sub>4</sub> | 69                     |
| 4         | sat. aq K <sub>2</sub> CO <sub>3</sub>                  | 67                     |
| 5         | sat. aq CS <sub>2</sub> CO <sub>3</sub>                 | 75                     |
| 6         | sat. aq KOH                                             | 49                     |

<sup>a</sup> Standard conditions: **1a** (0.5 mmol), **2a** (1.0 mmol), *n*-Bu<sub>4</sub>NI (10 mol %), electrolyte (5.0 mL), Pt foils (1.0 × 1.5 cm<sup>2</sup>) as anode and cathode, undivided cell, constant current = 40 mA, 3 h, room temperature. <sup>b</sup> The yield of the product was determined by <sup>1</sup>H NMR spectroscopy.

## 2.3 Electrodes screening

**Table S3** Electrodes screening <sup>a</sup>

| 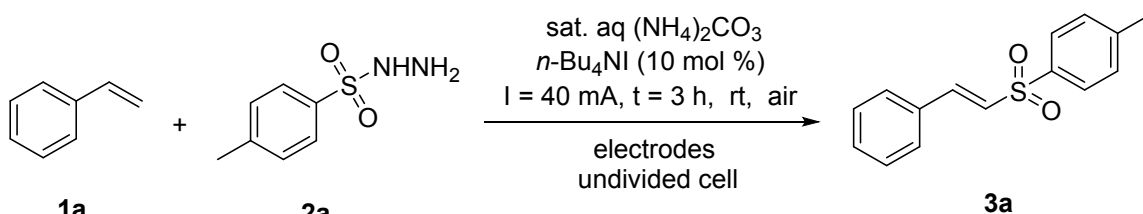 |            |                        |
|------------------------------------------------------------------------------------|------------|------------------------|
| <b>1a</b>                                                                          | <b>2a</b>  | <b>3a</b>              |
| Entry                                                                              | Electrodes | Yield [%] <sup>b</sup> |
| 1                                                                                  | Pt - Pt    | 88                     |
| 2 <sup>c</sup>                                                                     | Pt - C     | 64                     |
| 3 <sup>d</sup>                                                                     | Pt - RVC   | 57                     |
| 4 <sup>c</sup>                                                                     | C - C      | 72                     |
| 5 <sup>d</sup>                                                                     | RVC - RVC  | 70                     |

<sup>a</sup> Standard conditions: **1a** (0.5 mmol), **2a** (1.0 mmol), *n*-Bu<sub>4</sub>NI (10 mol %), sat. aq (NH<sub>4</sub>)<sub>2</sub>CO<sub>3</sub> (5.0 mL) as electrolyte, Pt foils (1.0 × 1.5 cm<sup>2</sup>) as anode and cathode, undivided cell, constant current = 40 mA, 3 h, room temperature. <sup>b</sup> The yield of the product was determined by <sup>1</sup>H NMR spectroscopy. <sup>c</sup> Graphite rods (diameter: 0.5cm, height: 1.78 cm). <sup>d</sup> Reticulated vitreous carbon RVC (100 PPI, 1.5 cm × 1cm × 0.2 cm)

## 3. General procedure for the vinyl sulfones

Into a round bottom flask was added **1** (0.5 mmol, 1.0 equiv), **2** (1.0 mmol, 2.0 equiv), *n*-Bu<sub>4</sub>NI (10 mol %) and sat. aq (NH<sub>4</sub>)<sub>2</sub>CO<sub>3</sub> (5mL). The resulting solution was electrolyzed with a pair of Pt foil (1.0×1.5 cm<sup>2</sup>) as electrodes at constant current (40 mA) at ambient temperature for 3h (8.95 F/mol), The reaction mixture was extracted with ethyl acetate (3×15 mL). The combined organic layer was washed with brine (10 mL), dried over MgSO<sub>4</sub>. The concentrated residue was purified by column chromatography on a silica gel to afford the pure product **3**.

## 4. The gram scale synthesis of the product 3a

Procedure for **3a**. To a round-bottomed flask (150 mL) was added **1a** (6 mmol, 1.0 equiv), **2a** (14 mmol, 2.5 equiv), *n*-Bu<sub>4</sub>NI (10 mol %) and sat. aq (NH<sub>4</sub>)<sub>2</sub>CO<sub>3</sub> (80mL). The reaction flask was equipped with Pt foils as anode (2.0 × 3.0 cm<sup>2</sup>) and cathode (2.0 × 3.0 cm<sup>2</sup>). The solution was electrolyzed under a constant current at ambient temperature (40 mA) for 28 h (6.96 F/mol). After electrolysis, the reaction mixture was extracted with ethyl acetate (3 × 80 mL). The combined organic layer was washed with brine (80 mL) and dried over MgSO<sub>4</sub>, filtered and concentrated. The resulting mixture was purified by silica gel column chromatography to afford **3a** in the yield of 72%.

## 5. Cyclic voltammograms

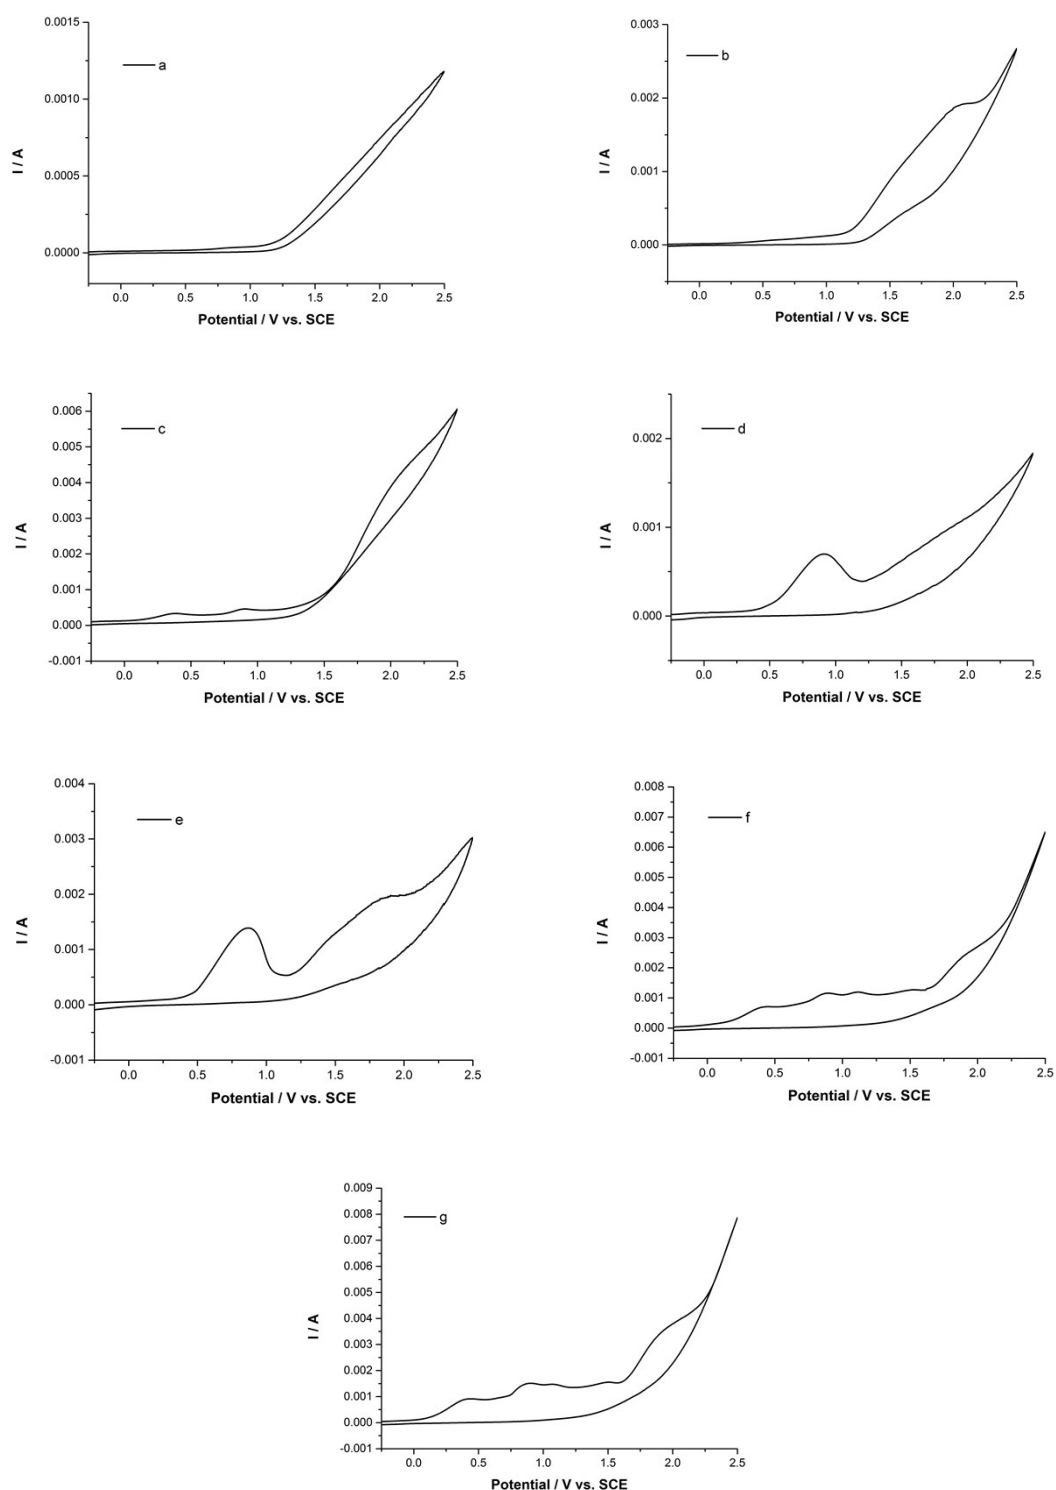

**Figure 1.** Cyclic voltammograms of related compounds in sat.aq (NH<sub>4</sub>)<sub>2</sub>CO<sub>3</sub>, Using a glassy carbon electrode as working electrode (d = 3 mm), a Pt wire as counter electrode, and a saturated calomel electrode (SCE) as a reference electrode, at 100 mV/s scan rate: (a) none; (b) **1a** (0.005 M); (c) **2a** (0.005 M); (d) *n*-Bu<sub>4</sub>NI (0.001 M); (e) **1a** (0.005 M) and *n*-Bu<sub>4</sub>NI (0.001 M); (f) **2a** (0.005 M) and *n*-Bu<sub>4</sub>NI (0.001 M); (g) **1a** (0.005 M), **2a** (0.005 M) and *n*-Bu<sub>4</sub>NI (0.001 M).

## 6. Spectroscopic data of products

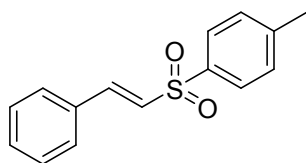

**3a**

**(*E*)-1-Methyl-4-(styrylsulfonyl)benzene (3a).**<sup>1</sup> The crude product was purified by column chromatography on silica gel to give **3a** as a white solid (105.9 mg, 82% yield).

<sup>1</sup>H NMR (400 MHz, CDCl<sub>3</sub>) δ 7.83 (d, *J* = 8.0 Hz, 1H), 7.65 (d, *J* = 16.0 Hz, 1H), 7.47 – 7.46 (m, 2H), 7.39 – 7.33 (m, 5H), 6.86 (d, *J* = 16.0 Hz, 1H), 2.43 (s, 3H). <sup>13</sup>C NMR (100 MHz, CDCl<sub>3</sub>) δ 144.50, 142.03, 137.86, 132.55, 131.21, 130.08, 129.16, 128.62, 127.80, 127.76, 21.70.

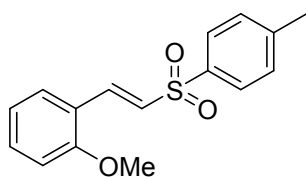

**3b**

**(*E*)-1-methoxy-2-(2-tosylvinyl)benzene (3b).**<sup>2</sup> The crude product was purified by column chromatography on silica gel to give **3b** as a colourless oil (116.8 mg, 81% yield).

<sup>1</sup>H NMR (400 MHz, CDCl<sub>3</sub>) δ 7.88-7.81 (m, 3H), 7.41 – 7.31 (m, 4H), 7.06 (d, *J* = 16.0 Hz, 1H), 6.96 – 6.90 (m, 2H), 3.86 (s, 3H), 2.42 (s, 3H). <sup>13</sup>C NMR (100 MHz, CDCl<sub>3</sub>) δ 158.93, 144.16, 138.40, 138.13, 132.51, 130.81, 129.98, 128.36, 127.76, 121.42, 120.89, 111.38, 55.62, 21.70.

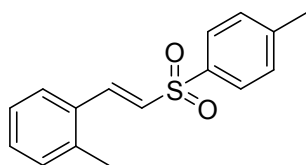

**3c**

**(*E*)-1-methyl-2-(2-tosylvinyl)benzene (3c).**<sup>1</sup> The crude product was purified by column chromatography on silica gel to give **3c** as a pale yellow solid (106.3 mg, 78% yield).

<sup>1</sup>H NMR (400 MHz, CDCl<sub>3</sub>) δ 7.90 (d, *J* = 12.0 Hz, 1H), 7.79 (d, *J* = 8.0 Hz, 2H), 7.38 (d, *J* = 8.0 Hz, 1H), 7.30 (d, *J* = 8.0 Hz, 2H), 7.23 (d, *J* = 8.0 Hz, 1H), 7.17 – 7.11 (m, 2H), 6.74 (d, *J* = 16.0 Hz, 1H), 2.40 (s, 3H), 2.39 (s, 3H). <sup>13</sup>C NMR (100 MHz, CDCl<sub>3</sub>) δ 144.45, 139.68, 138.19, 137.88, 131.44, 131.11, 130.92, 130.07, 128.67, 127.79, 126.94, 126.56, 21.69, 19.83.

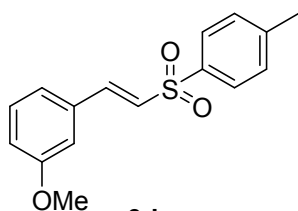

**3d**

**(*E*)-1-methoxy-3-(2-tosylvinyl)benzene (3d).**<sup>2</sup> The crude product was purified by column chromatography on silica gel to give **3d** as a colourless oil (115.4 mg, 80% yield).

$^1\text{H}$  NMR (400 MHz,  $\text{CDCl}_3$ )  $\delta$  7.82 (d,  $J$  = 12.0 Hz, 2H), 7.62 (d,  $J$  = 16.0 Hz, 1H), 7.34 (d,  $J$  = 8.0 Hz, 2H), 7.29 – 7.27 (m, 1H), 7.06 (d,  $J$  = 8.0 Hz, 1H), 6.96 – 6.93 (m, 2H), 6.84 (d,  $J$  = 16.0 Hz, 1H), 3.80 (s, 3H), 2.43 (s, 3H).  $^{13}\text{C}$  NMR (100 MHz,  $\text{CDCl}_3$ )  $\delta$  160.12, 144.56, 142.02, 137.88, 133.91, 130.22, 130.12, 128.06, 127.86, 121.30, 117.17, 113.47, 55.49, 21.75.

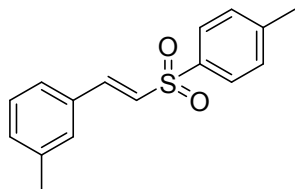

**3e**

**(*E*)-1-methyl-3-(2-tosylvinyl)benzene (3e).**<sup>2</sup> The crude product was purified by column chromatography on silica gel to give **3e** as a pale yellow solid (102.2 mg, 75% yield).

$^1\text{H}$  NMR (400 MHz,  $\text{CDCl}_3$ )  $\delta$  7.85 (d,  $J$  = 8.0 Hz, 2H), 7.64 (d,  $J$  = 12.0 Hz, 1H), 7.35 (d,  $J$  = 8.0 Hz, 2H), 7.29 – 7.28 (m, 3H), 7.24 – 7.22 (m, 1H), 6.87 (d,  $J$  = 16.0 Hz, 1H), 2.44 (s, 3H), 2.36 (s, 3H).  $^{13}\text{C}$  NMR (100 MHz,  $\text{CDCl}_3$ )  $\delta$  144.42, 142.21, 138.89, 137.99, 132.51, 132.03, 130.05, 129.19, 129.04, 127.78, 127.52, 125.86, 21.69, 21.34.

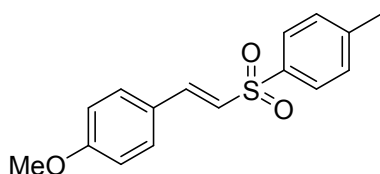

**3f**

**(*E*)-1-methoxy-4-(2-tosylvinyl)benzene (3f).**<sup>1</sup> The crude product was purified by column chromatography on silica gel to give **3f** as a white solid (126.9 mg, 88% yield).

$^1\text{H}$  NMR (400 MHz,  $\text{CDCl}_3$ )  $\delta$  7.81 (d,  $J$  = 8.0 Hz, 2H), 7.59 (d,  $J$  = 16.0 Hz, 1H), 7.40 (d,  $J$  = 8.0 Hz, 2H), 7.31 (d,  $J$  = 8.0 Hz, 2H), 6.87 (d,  $J$  = 12.0 Hz, 2H), 6.71 (d,  $J$  = 12.0 Hz, 1H), 3.80 (s, 3H), 2.40 (s, 3H).  $^{13}\text{C}$  NMR (100 MHz,  $\text{CDCl}_3$ )  $\delta$  162.07, 144.20, 141.81, 138.28, 130.38, 129.97, 127.61, 125.11, 124.91, 114.57, 55.50, 21.64.

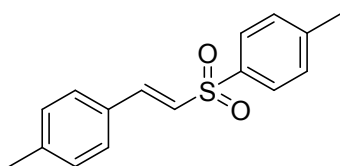

**3g**

**(*E*)-1-methyl-4-((4-methylstyryl)sulfonyl)benzene (3g).**<sup>1</sup> The crude product was purified by column chromatography on silica gel to give **3g** as a white solid (113.1 mg, 83% yield).

$^1\text{H}$  NMR (400 MHz,  $\text{CDCl}_3$ )  $\delta$  7.83 (d,  $J$  = 8.0 Hz, 2H), 7.63 (d,  $J$  = 16.0 Hz, 1H), 7.37 – 7.32 (m, 4H), 7.18 (d,  $J$  = 8.0 Hz, 2H), 6.80 (d,  $J$  = 16.0 Hz, 1H), 2.43 (s, 3H), 2.36 (s, 3H).  $^{13}\text{C}$  NMR (100 MHz,  $\text{CDCl}_3$ )  $\delta$  144.38, 142.13, 141.85, 138.12, 130.06, 129.91, 129.85, 128.66, 127.78, 126.58, 21.72, 21.63.

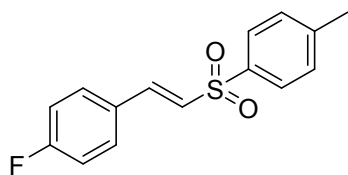

**3h**

**(*E*)-1-fluoro-4-(2-tosylvinyl)benzene (3h).**<sup>2</sup> The crude product was purified by column chromatography on silica gel to give **3h** as a colourless oil (92.6 mg, 67% yield).

<sup>1</sup>H NMR (400 MHz, CDCl<sub>3</sub>) δ 7.82 (d, *J* = 8.0 Hz, 2H), 7.61 (d, *J* = 16.0 Hz, 1H), 7.48 – 7.45 (m, 2H), 7.34 (d, *J* = 8.0 Hz, 2H), 7.08 – 7.04 (m, 2H), 6.79 (d, *J* = 16.0 Hz, 1H), 2.42 (s, 3H). <sup>13</sup>C NMR (100 MHz, CDCl<sub>3</sub>) δ 164.42 (d, *J*<sub>C-F</sub> = 251.0 Hz), 144.60, 140.73, 137.81, 130.68 (d, *J*<sub>C-F</sub> = 9.0 Hz), 130.13, 128.87 (d, *J*<sub>C-F</sub> = 3.0 Hz), 127.83, 127.58 (d, *J*<sub>C-F</sub> = 2.0 Hz), 116.41 (d, *J*<sub>C-F</sub> = 2.2 Hz), 21.72.

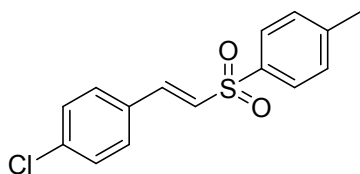

**3i**

**(*E*)-1-chloro-4-(2-tosylvinyl)benzene (3i).**<sup>1</sup> The crude product was purified by column chromatography on silica gel to give **3i** as a white solid (109.8 mg, 75% yield).

<sup>1</sup>H NMR (400 MHz, CDCl<sub>3</sub>) δ 7.82 (d, *J* = 8.0 Hz, 2H), 7.60 (d, *J* = 16.0 Hz, 1H), 7.42 – 7.34 (m, 6H), 6.83 (d, *J* = 16.0 Hz, 1H), 2.43 (s, 2H). <sup>13</sup>C NMR (100 MHz, CDCl<sub>3</sub>) δ 144.73, 140.58, 137.68, 137.28, 131.13, 130.19, 129.85, 129.53, 128.44, 127.92, 21.78.

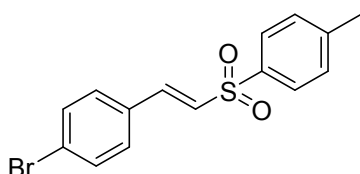

**3j**

**(*E*)-1-bromo-4-(2-tosylvinyl)benzene (3j).**<sup>2</sup>

The crude product was purified by column chromatography on silica gel to give **3j** as a white solid (118.1 mg, 70% yield).

<sup>1</sup>H NMR (400 MHz, CDCl<sub>3</sub>) δ 7.82 (d, *J* = 8.0 Hz, 2H), 7.59 (d, *J* = 16.0 Hz, 1H), 7.52 (d, *J* = 8.0 Hz, 2H), 7.34 (t, *J* = 8.0 Hz, 4H), 6.85 (d, *J* = 12.0 Hz, 1H), 2.44 (s, 3H). <sup>13</sup>C NMR (100 MHz, CDCl<sub>3</sub>) δ 144.76, 140.66, 137.67, 132.52, 131.58, 130.21, 130.03, 128.57, 127.95, 125.69, 21.80

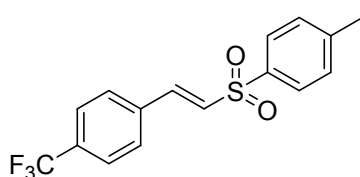

**3k**

**(*E*)-1-methyl-4-((4-(trifluoromethyl)styryl)sulfonyl)benzene (3k).**<sup>1</sup> The crude product was purified by column chromatography on silica gel to give **3k** as a white solid (89.8mg, 55% yield). <sup>1</sup>H NMR (400 MHz, CDCl<sub>3</sub>) δ 7.84 (d, *J* = 8.0 Hz, 2H), 7.67 (d, *J* = 16.0 Hz, 1H), 7.65 – 7.57 (m, 4H), 7.35 (d, *J* = 8.0 Hz, 2H), 6.97 (d, *J* = 16.0 Hz, 1H), 2.43 (s, 3H). <sup>13</sup>C NMR (100 MHz, CDCl<sub>3</sub>) δ 144.93, 139.99, 137.30, 136.01, 132.55 (q, *J*<sub>C-F</sub> = 32.0 Hz), 130.56, 130.21, 128.82, 127.96, 126.09 (q, *J*<sub>C-F</sub> = 4.0 Hz), 123.75 (q, *J*<sub>C-F</sub> = 271.0 Hz).

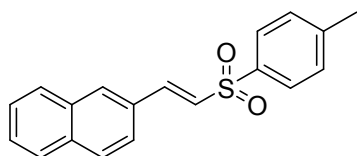

**3l**

**(*E*)-2-(2-tosylvinyl)naphthalene (3l).**<sup>2</sup> The crude product was purified by column chromatography on silica gel to give **3l** as a yellow solid (114.1 mg, 74% yield). <sup>1</sup>H NMR (400 MHz, CDCl<sub>3</sub>) δ 7.93 – 7.80 (m, 7H), 7.55 – 7.52 (m, 3H), 7.35 (d, *J* = 8.0 Hz, 2H), 6.96 (d, *J* = 16.0 Hz, 1H), 2.44 (s, 3H). <sup>13</sup>C NMR (101 MHz, CDCl<sub>3</sub>) δ 144.55, 142.15, 137.98, 134.60, 133.26, 130.98, 130.14, 130.05, 129.08, 128.81, 127.96, 127.89, 127.81, 127.12, 123.58, 21.77.

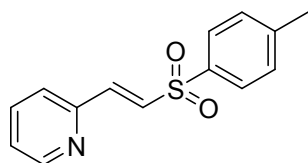

**3m**

**(*E*)-2-(2-tosylvinyl)pyridine (3m).**<sup>1</sup> The crude product was purified by column chromatography on silica gel to give **3m** as a yellow oil (75.2mg, 58% yield). <sup>1</sup>H NMR (400 MHz, CDCl<sub>3</sub>) δ 8.60 (d, *J* = 8.0 Hz, 1H), 7.84 (d, *J* = 8.0 Hz, 2H), 7.75 – 7.71 (m, 1H), 7.62 (d, *J* = 16.0 Hz, 1H), 7.44 (d, *J* = 16.0 Hz, 1H), 7.40 (d, *J* = 4.0 Hz, 1H), 7.34 (d, *J* = 8.0 Hz, 2H), 7.30 – 7.27 (m, 1H), 2.42 (s, 3H). <sup>13</sup>C NMR (100 MHz, CDCl<sub>3</sub>) δ 151.20, 150.36, 144.72, 140.17, 137.38, 137.18, 132.29, 130.10, 128.02, 125.46, 125.06, 21.71.

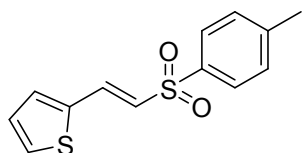

**3n**

**(*E*)-2-(2-tosylvinyl)thiophene (3n).**<sup>2</sup> The crude product was purified by column chromatography on silica gel to give **3n** as a brown solid (80.7 mg, 61% yield). <sup>1</sup>H NMR (400 MHz, CDCl<sub>3</sub>) δ 7.81 (d, *J* = 8.0 Hz, 2H), 7.76 (d, *J* = 16.0 Hz, 1H), 7.41 (d, *J* = 4.0 Hz, 1H), 7.33 (d, *J* = 8.0 Hz, 2H), 7.27 (d, *J* = 12.0 Hz, 1H), 7.06 – 7.04 (m, 1H), 6.63 (d, *J* = 16.0 Hz, 1H), 2.43 (s, 3H). <sup>13</sup>C NMR (100 MHz, CDCl<sub>3</sub>) δ 144.50, 138.03, 137.18, 134.73, 132.39,

130.11, 129.98, 128.44, 127.77, 125.97, 21.73.

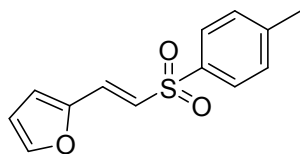

**3o**

**(E)-2-(2-tosylvinyl)furan (3o).**<sup>2</sup> The crude product was purified by column chromatography on silica gel to give **3o** as a white solid (84.5 mg, 68% yield).

<sup>1</sup>H NMR (400 MHz, CDCl<sub>3</sub>)  $\delta$  7.80 (d,  $J$  = 8.0 Hz, 2H), 7.46 (s, 1H), 7.40 (d,  $J$  = 16.0 Hz, 1H), 7.32 (d,  $J$  = 8.0 Hz, 2H), 6.73 (d,  $J$  = 12.0 Hz, 1H), 6.68 (d,  $J$  = 4.0 Hz, 1H), 6.47 – 6.46 (m, 1H), 2.42 (s, 3H). <sup>13</sup>C NMR (100 MHz, CDCl<sub>3</sub>)  $\delta$  148.92, 145.69, 144.45, 138.07, 130.08, 128.56, 127.74, 125.28, 116.83, 112.70, 21.73.

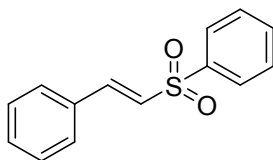

**4a**

**(E)-2-(phenylsulfonyl)vinylbenzene (4a).**<sup>3</sup> The crude product was purified by column chromatography on silica gel to give **4a** as a pale yellow solid (99.0 mg, 81% yield).

<sup>1</sup>H NMR (400 MHz, CDCl<sub>3</sub>)  $\delta$  7.97 – 7.94 (m, 2H), 7.69 (d,  $J$  = 16.0 Hz, 1H), 7.62 – 7.60 (m, 1H), 7.56 – 7.53 (m, 2H), 7.49 – 7.47 (m, 2H), 7.41 – 7.38 (m, 3H), 6.87 (d,  $J$  = 16.0 Hz, 1H). <sup>13</sup>C NMR (100 MHz, CDCl<sub>3</sub>)  $\delta$  142.62, 140.85, 133.52, 132.47, 131.35, 129.47, 129.21, 128.70, 127.76, 127.43.

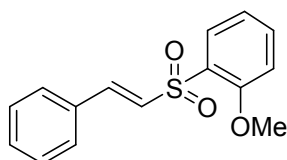

**4b**

**(E)-1-methoxy-2-(styrylsulfonyl)benzene (4b).**<sup>2</sup> The crude product was purified by column chromatography on silica gel to give **4b** as a yellow oil (105.6 mg, 77% yield).

<sup>1</sup>H NMR (400 MHz, CDCl<sub>3</sub>)  $\delta$  8.04 – 8.02 (m, 1H), 7.69 (d,  $J$  = 12.0 Hz, 1H), 7.58 – 7.54 (m, 1H), 7.50 – 7.49 (m, 2H), 7.40 – 7.39 (m, 3H), 7.16 – 7.08 (m, 2H), 7.01 (d,  $J$  = 8.0 Hz, 1H), 3.96 (s, 3H). <sup>13</sup>C NMR (100 MHz, CDCl<sub>3</sub>)  $\delta$  157.48, 143.43, 135.50, 132.98, 131.09, 129.60, 129.17, 128.80, 128.60, 127.12, 120.86, 112.57, 56.42.

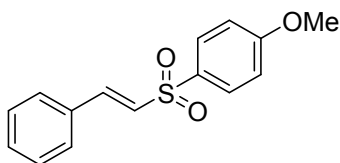

**4c**

**(*E*)-1-methoxy-4-(styrylsulfonyl)benzene (4c).**<sup>3</sup> The crude product was purified by column chromatography on silica gel to give **4c** as a white oil (118.0 mg, 86% yield).

<sup>1</sup>H NMR (400 MHz, CDCl<sub>3</sub>) δ 7.87 (d, *J* = 8.0 Hz, 2H), 7.62 (d, *J* = 16.0 Hz, 1H), 7.46 – 7.44 (m, 2H), 7.38 – 7.35 (m, 3H), 7.00 (d, *J* = 12.0 Hz, 2H), 6.89 – 6.84 (m, 1H), 3.85 (s, 3H). <sup>13</sup>C NMR (100 MHz, CDCl<sub>3</sub>) δ 163.67, 141.43, 132.58, 132.28, 131.09, 129.95, 129.12, 128.55, 128.08, 114.67, 55.77.

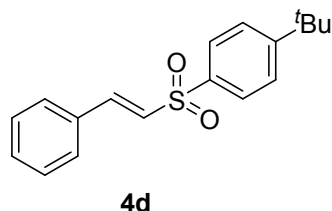

**(*E*)-1-tert-butyl-4-(styrylsulfonyl)benzene (4d).**<sup>3</sup> The crude product was purified by column chromatography on silica gel to give **4d** as a white solid (103.7 mg, 69% yield).

<sup>1</sup>H NMR (400 MHz, CDCl<sub>3</sub>) δ 7.87 (d, *J* = 8.0 Hz, 2H), 7.67 (d, *J* = 16.0 Hz, 1H), 7.55 (d, *J* = 8.0 Hz, 2H), 7.47 (d, *J* = 4.0 Hz, 2H), 7.39 – 7.37 (m, 3H), 6.87 (d, *J* = 16.0 Hz, 1H), 1.33 (s, 9H). <sup>13</sup>C NMR (100 MHz, CDCl<sub>3</sub>) δ 157.46, 142.09, 137.75, 132.57, 131.23, 129.18, 128.66, 127.74, 127.66, 126.50, 35.35, 31.18.

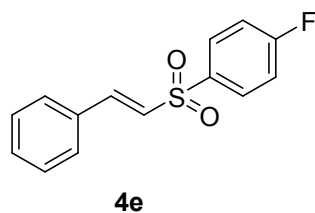

**(*E*)-1-fluoro-4-(styrylsulfonyl)benzene (4e).**<sup>3</sup> The crude product was purified by column chromatography on silica gel to give **4e** as a pale yellow solid (85.3 mg, 65% yield).

<sup>1</sup>H NMR (400 MHz, CDCl<sub>3</sub>) δ 7.98 – 7.95 (m, 2H), 7.68 (d, *J* = 16.0 Hz, 1H), 7.49 – 7.47 (m, 2H), 7.43 – 7.37 (m, 3H), 7.26 – 7.19 (m, 2H), 6.86 (d, *J* = 16.0 Hz, 1H). <sup>13</sup>C NMR (100 MHz, CDCl<sub>3</sub>) δ 165.74 (d, *J*<sub>C-F</sub> = 255.0 Hz), 142.82, 136.93 (d, *J*<sub>C-F</sub> = 3.0 Hz), 132.34, 131.47, 130.64 (d, *J* = 10.0 Hz), 129.25, 128.74, 127.24, 116.77 (d, *J* = 23.0 Hz).

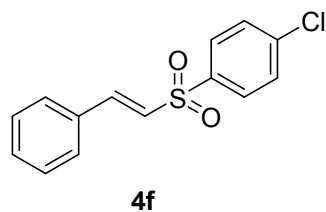

**(*E*)-1-chloro-4-(styrylsulfonyl)benzene (4f).**<sup>3</sup> The crude product was purified by column chromatography on silica gel to give **4f** as a brown solid (101.8 mg, 73% yield).

<sup>1</sup>H NMR (400 MHz, CDCl<sub>3</sub>) δ 7.79 (d, *J* = 8.0 Hz, 2H), 7.59 (d, *J* = 16.0 Hz, 1H), 7.41 – 7.37 (m, 4H), 7.31 – 7.28 (m, 3H), 6.73 (d, *J* = 16.0 Hz, 1H). <sup>13</sup>C NMR (100 MHz, CDCl<sub>3</sub>) δ 143.10, 140.07, 139.35, 132.23, 131.46, 129.70, 129.20, 129.18, 128.71, 126.95.

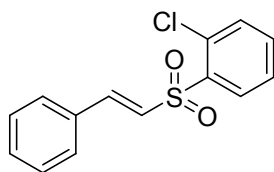

**4g**

**(*E*)-1-chloro-2-(styrylsulfonyl)benzene (4g).** <sup>2</sup> The crude product was purified by column chromatography on silica gel to give **4g** as a pale yellow solid (89.2 mg, 64% yield).

<sup>1</sup>H NMR (400 MHz, CDCl<sub>3</sub>) δ 8.23 (d, *J* = 8.0 Hz, 1H), 7.77 (d, *J* = 16.0 Hz, 1H), 7.53 – 7.39 (m, 8H), 7.08 (d, *J* = 12.0 Hz, 1H). <sup>13</sup>C NMR (100 MHz, CDCl<sub>3</sub>) δ 145.44, 138.43, 134.66, 132.95, 132.50, 132.03, 131.57, 130.85, 129.27, 128.85, 127.60, 125.47.

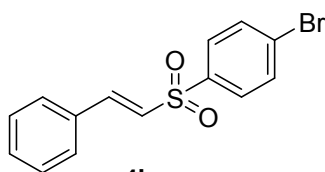

**4h**

**(*E*)-1-bromo-4-(styrylsulfonyl)benzene (4h).** <sup>3</sup> The crude product was purified by column chromatography on silica gel to give **4h** as a white solid (109.9 mg, 68% yield).

<sup>1</sup>H NMR (400 MHz, CDCl<sub>3</sub>) δ 8.19 (d, *J* = 8.0 Hz, 2H), 8.09 – 8.05 (m, 3H), 7.86 (d, *J* = 8.0 Hz, 2H), 7.81 – 7.76 (m, 3H), 7.22 (d, *J* = 16.0 Hz, 1H). <sup>13</sup>C NMR (100 MHz, CDCl<sub>3</sub>) δ 143.25, 139.96, 132.80, 132.32, 131.57, 129.36, 129.29, 128.79, 126.97.

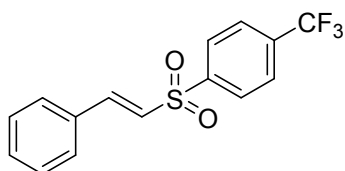

**4i**

**(*E*)-1-(styrylsulfonyl)-4-(trifluoromethyl)benzene (4i).** <sup>3</sup> The crude product was purified by column chromatography on silica gel to give **4i** as a pale yellow solid (95.3 mg, 61% yield).

<sup>1</sup>H NMR (400 MHz, CDCl<sub>3</sub>) δ 8.09 (d, *J* = 8.0 Hz, 2H), 7.81 (d, *J* = 8.0 Hz, 2H), 7.75 (d, *J* = 16.0 Hz, 1H), 7.51 – 7.49 (m, 2H), 7.43 – 7.38 (m, 3H), 6.88 (d, *J* = 16.0 Hz, 1H). <sup>13</sup>C NMR (100 MHz, CDCl<sub>3</sub>) δ 144.54 (d, *J*<sub>C-F</sub> = 1.0 Hz), 144.20, 135.12 (q, *J*<sub>C-F</sub> = 33.0 Hz), 132.16, 131.75, 129.30, 128.87, 128.37, 126.61 (q, *J*<sub>C-F</sub> = 3.0 Hz), 126.43, 123.30 (q, *J* = 272.0 Hz).

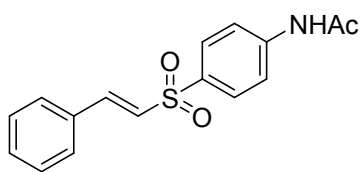

**4j**

**(*E*)-*N*-(4-(styrylsulfonyl)phenyl)acetamide (4j).** <sup>3</sup>

The crude product was purified by column chromatography on silica gel to give **4j** as a white solid (85.9 mg, 57% yield).

$^1\text{H}$  NMR (400 MHz,  $\text{CDCl}_3$ )  $\delta$  8.16 (s, 1H), 7.83 (d,  $J$  = 8.0 Hz, 2H), 7.71 (d,  $J$  = 8.0 Hz, 2H), 7.63 (d,  $J$  = 16.0 Hz, 1H), 7.47 (d,  $J$  = 4.0 Hz, 2H), 7.39 (d,  $J$  = 4.0 Hz, 3H), 6.85 (d,  $J$  = 12.0 Hz, 1H), 2.19 (s, 3H).  $^{13}\text{C}$  NMR (100 MHz,  $\text{CDCl}_3$ )  $\delta$  169.62, 143.25, 142.39, 134.75, 132.31, 131.43, 129.23, 128.93, 128.71, 127.28, 119.85, 24.73.

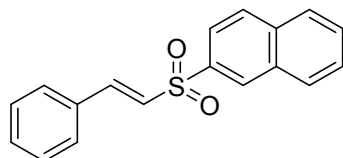

**4k**

**(E)-2-(styrylsulfonyl)naphthalene (4k).**<sup>3</sup> The crude product was purified by column chromatography on silica gel to give **4k** as a white solid (103.1 mg, 70% yield).

$^1\text{H}$  NMR (400 MHz,  $\text{CDCl}_3$ )  $\delta$  8.56 (s, 1H), 8.00–7.97 (m, 2H), 7.91–7.88 (m, 2H), 7.75 (d,  $J$  = 16.0 Hz, 1H), 7.67–7.59 (m, 2H), 7.50–7.47 (m, 2H), 7.40–7.35 (m, 3H), 6.94 (d,  $J$  = 16.0 Hz, 1H).  $^{13}\text{C}$  NMR (100 MHz,  $\text{CDCl}_3$ )  $\delta$  142.70, 137.66, 135.29, 132.52, 132.44, 131.34, 129.81, 129.51, 129.36, 129.32, 129.21, 128.72, 128.10, 127.79, 127.49, 122.69.

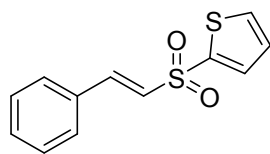

**4l**

**(E)-2-(styrylsulfonyl)thiophene (4l).**<sup>3</sup> The crude product was purified by column chromatography on silica gel to give **4l** as a yellow solid (85.1 mg, 68% yield).

$^1\text{H}$  NMR (400 MHz,  $\text{CDCl}_3$ )  $\delta$  7.73–7.66 (m, 3H), 7.50 (d,  $J$  = 8.0 Hz, 2H), 7.43–7.38 (m, 3H), 7.14 (t,  $J$  = 4.0 Hz, 1H), 6.97 (d,  $J$  = 16.0 Hz, 1H).  $^{13}\text{C}$  NMR (100 MHz,  $\text{CDCl}_3$ )  $\delta$  142.41, 142.33, 134.08, 133.63, 132.41, 131.46, 129.27, 128.78, 128.19, 128.05.

## 7. References

1. M. Pramanik, K. Choudhuri, P. Mal, *Asian J. Org. Chem.*, 2019, **8**, 144.
2. Y. Zhao, Y.-L. Lai, K.-S. Du, D.-Z. Lin, J.-M. Huang, *J. Org. Chem.*, 2017, **82**, 9655.
3. S. Cai, Y. Xu, D. Chen, L. Li, Q. Chen, M. Huang, W. Weng, *Org. Lett.*, 2016, **18**, 2990.

## 8. Copies of NMR spectra of products

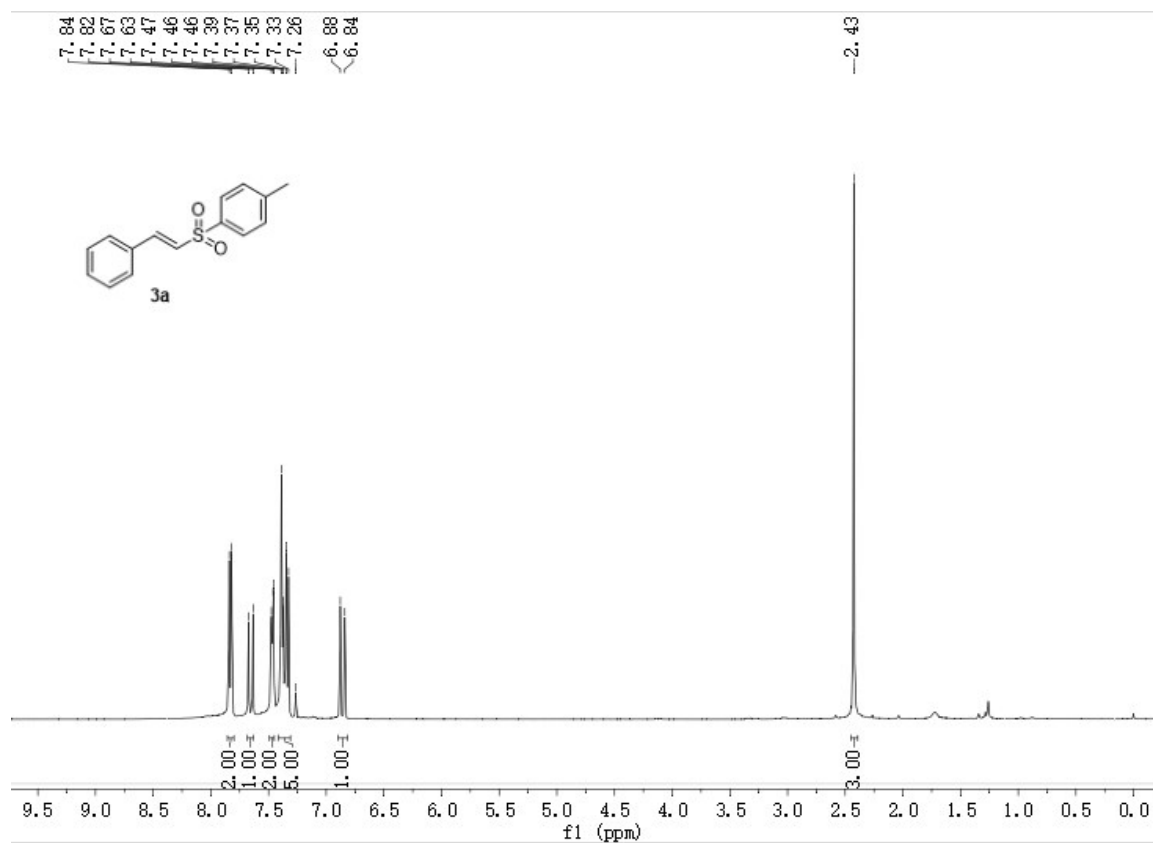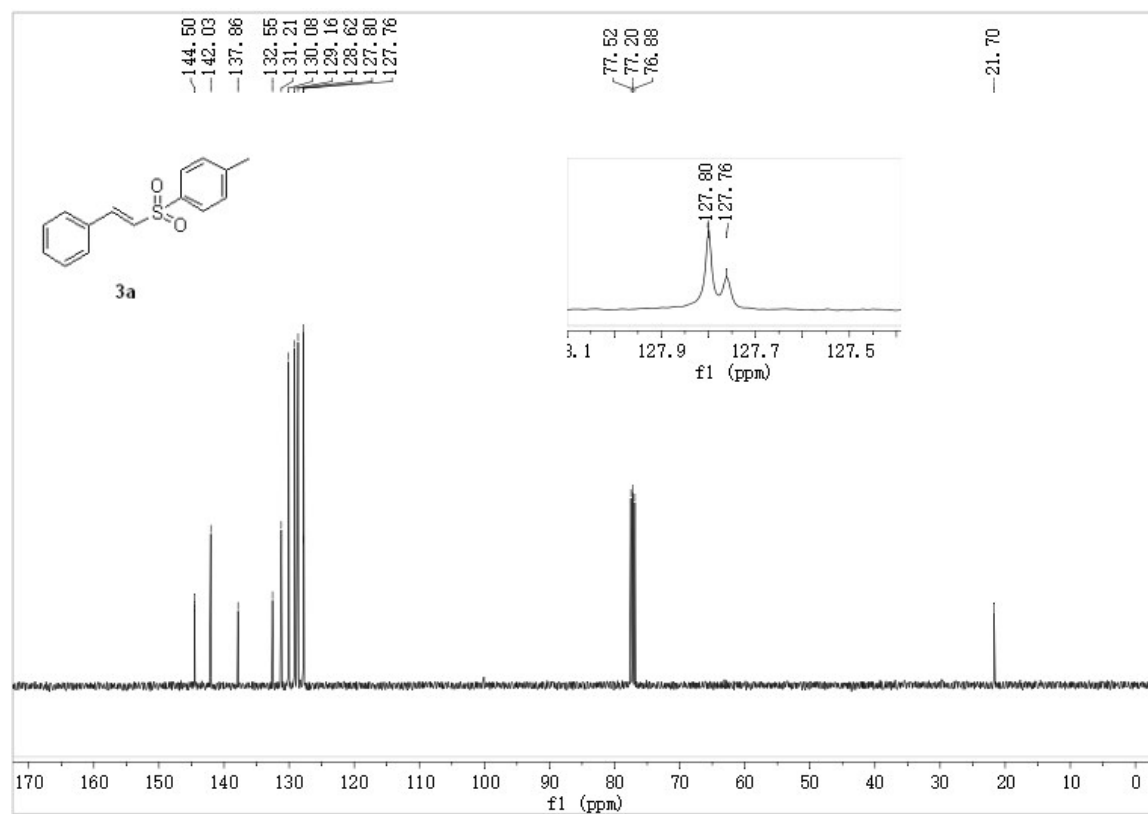

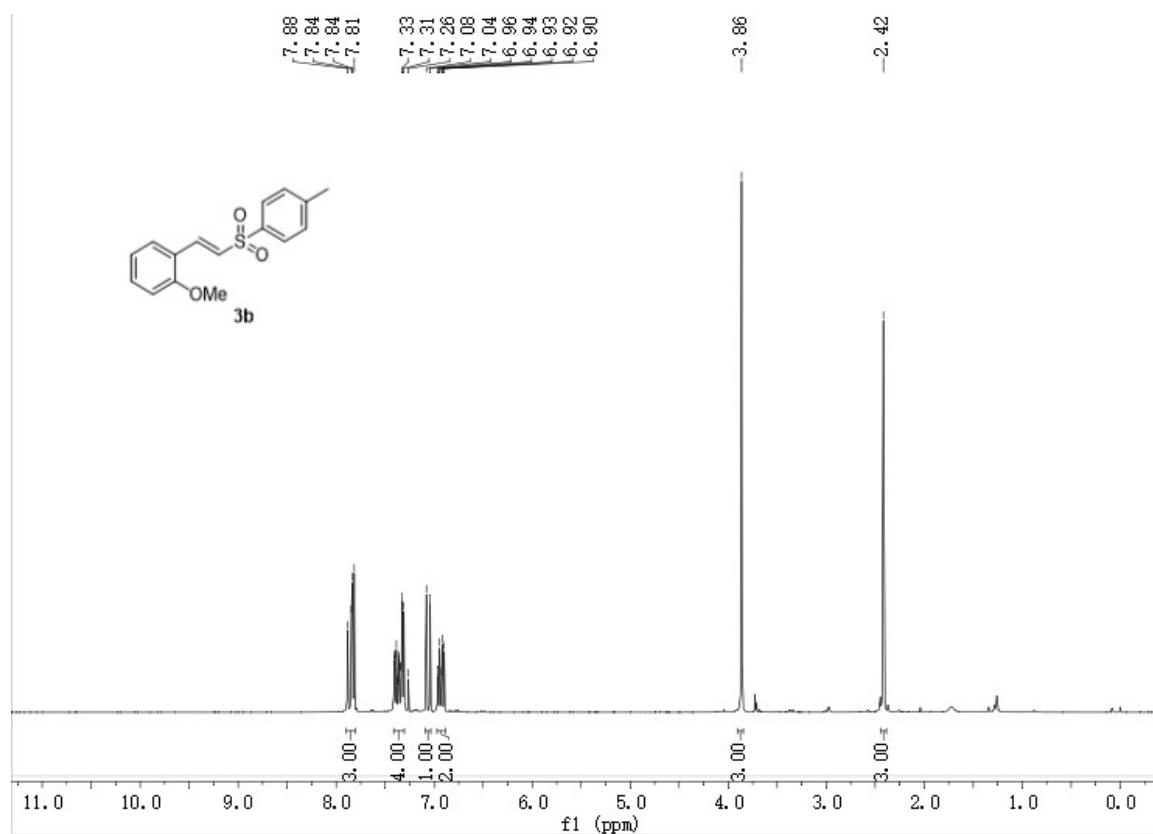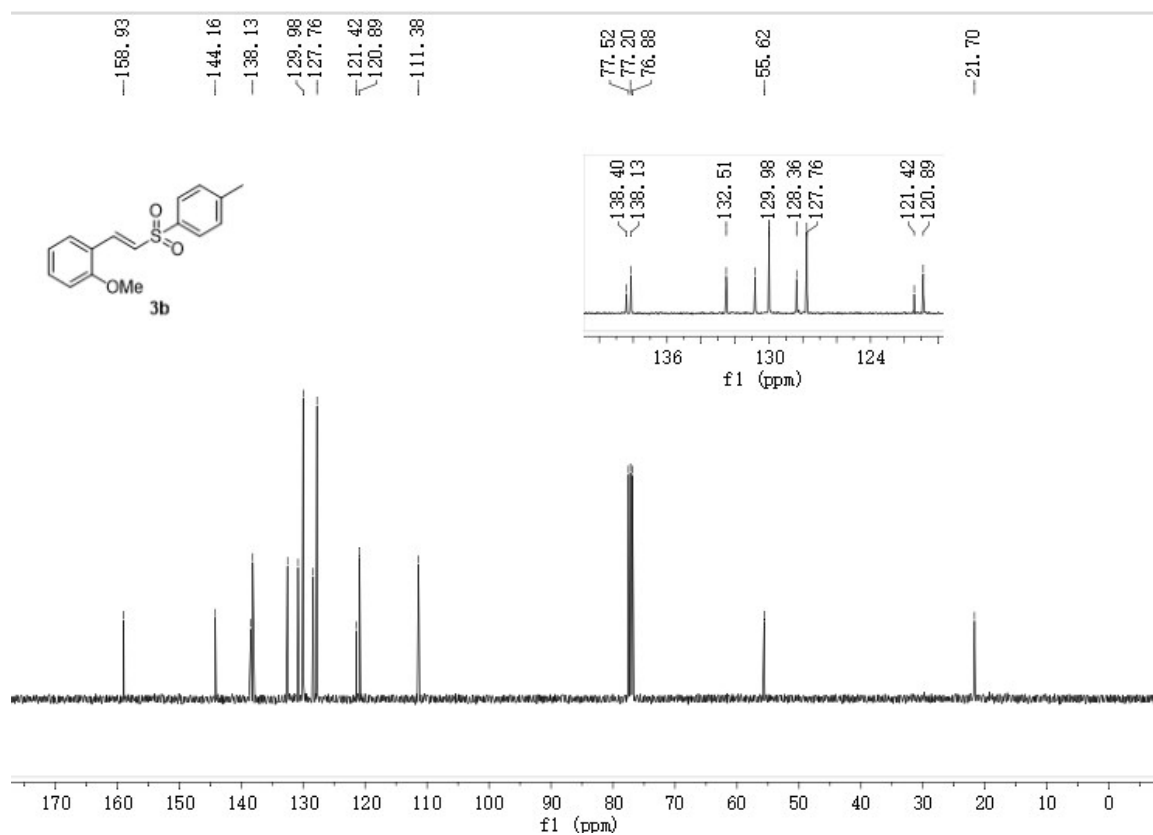

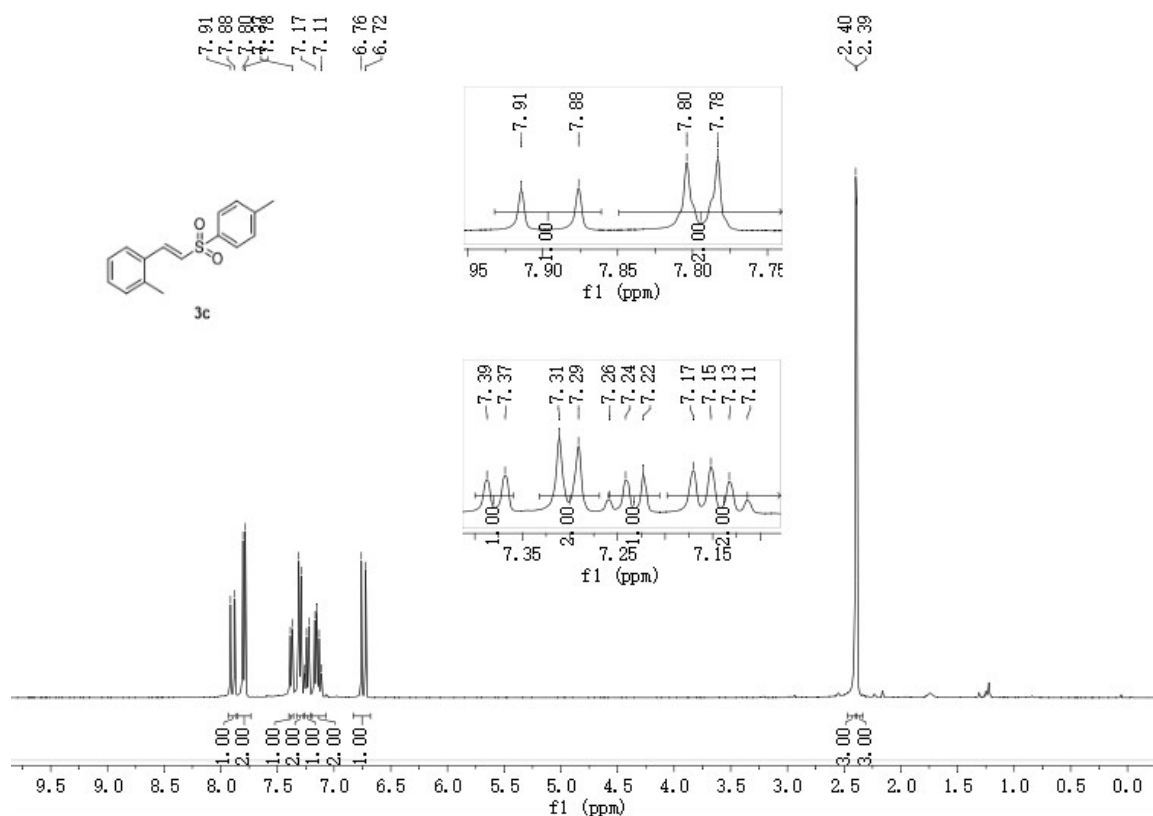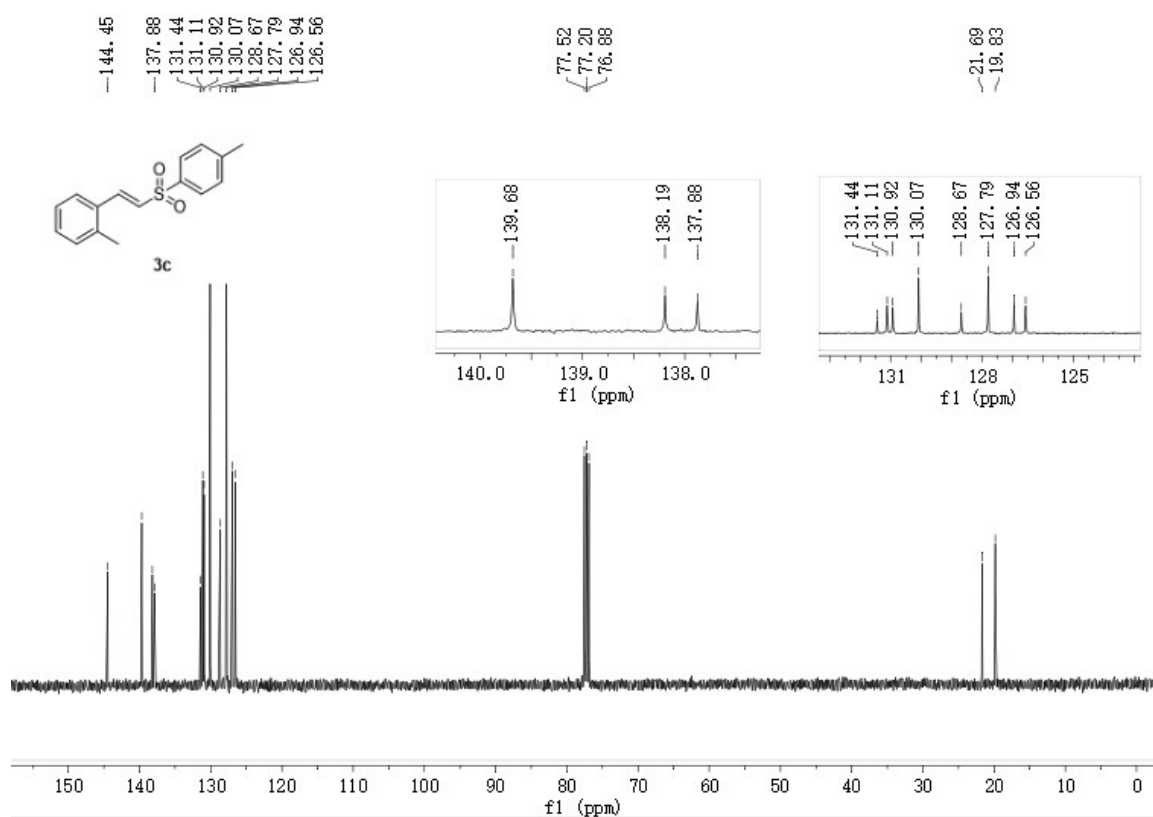

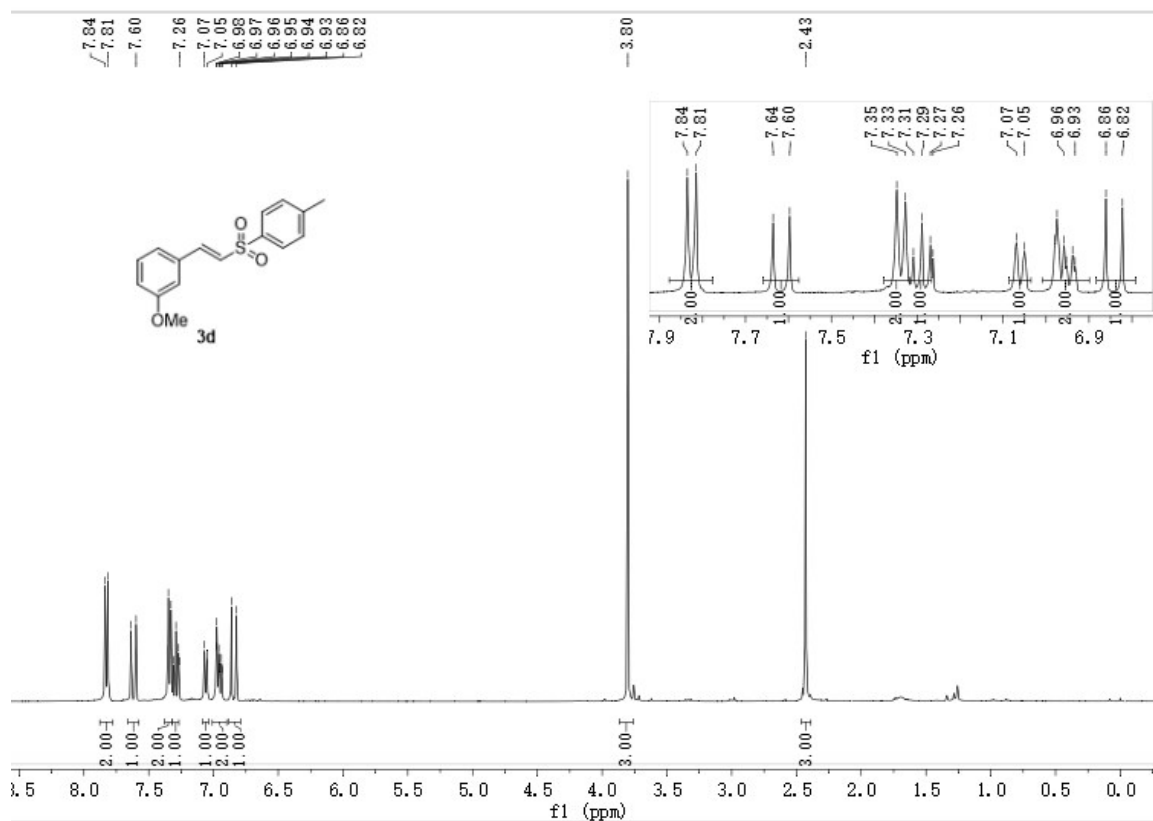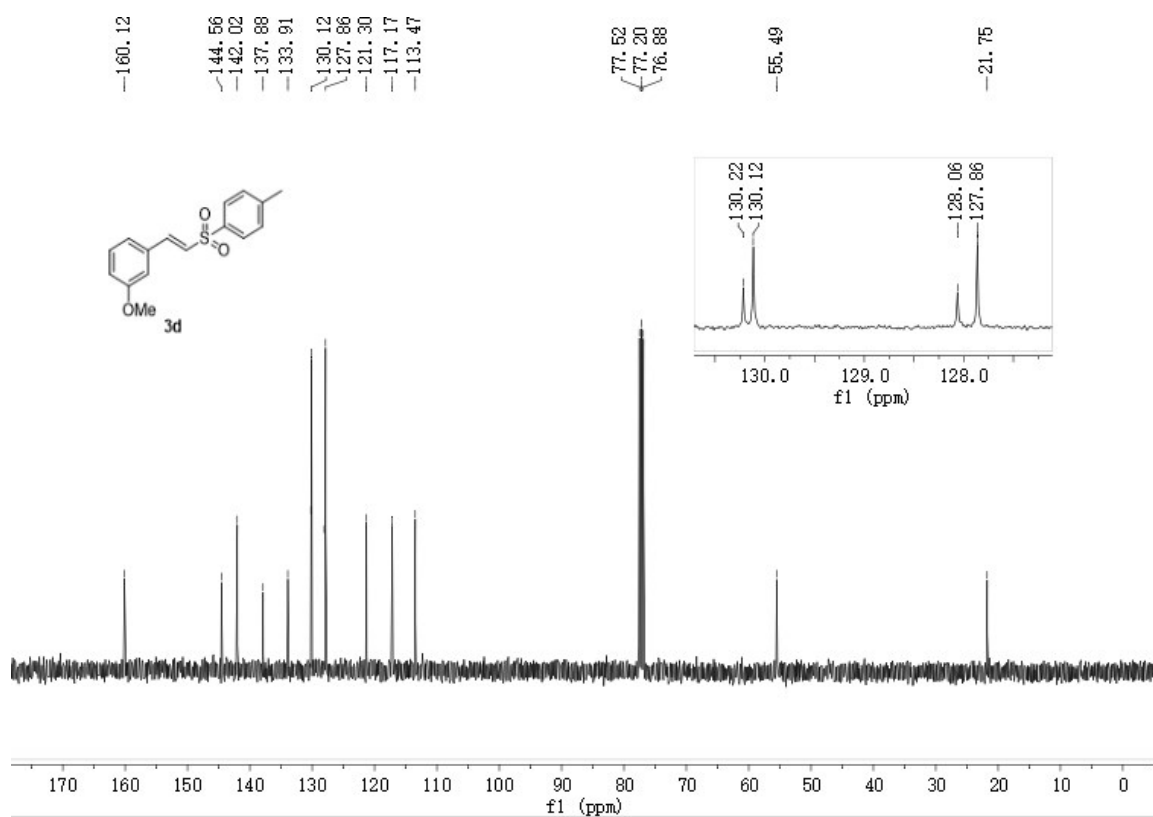

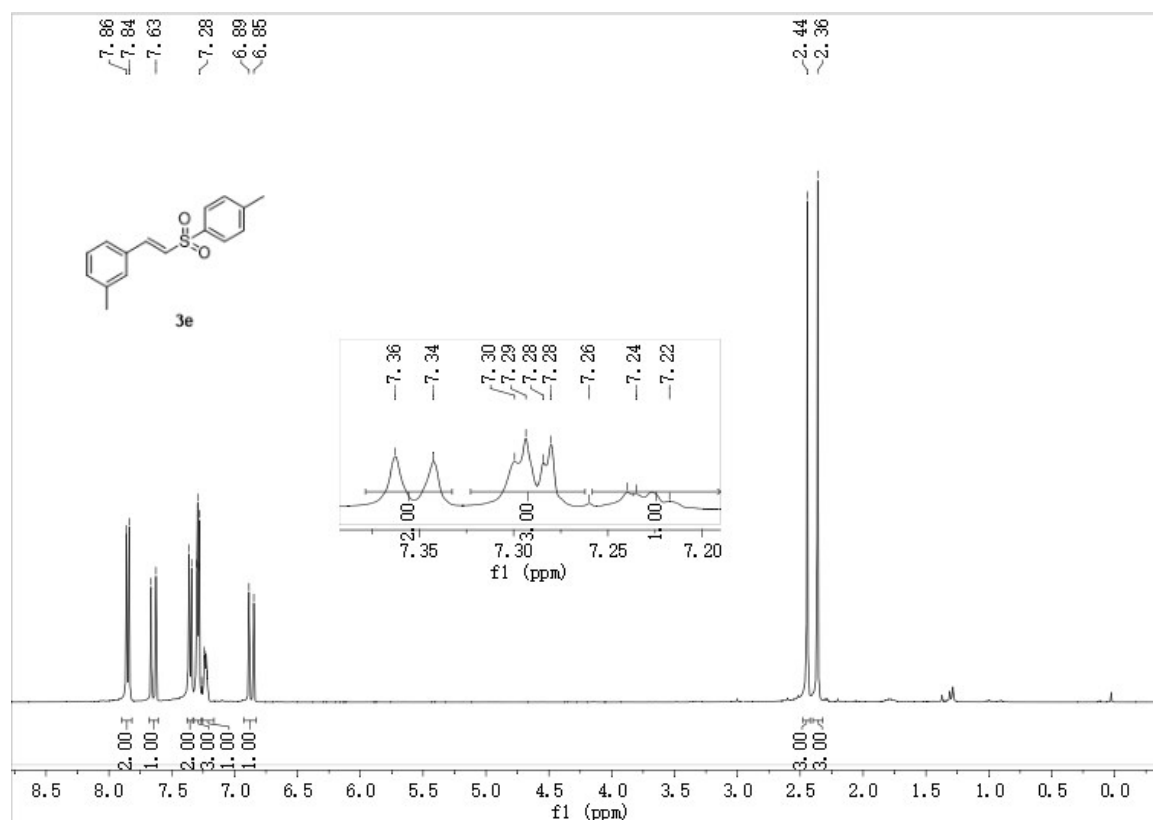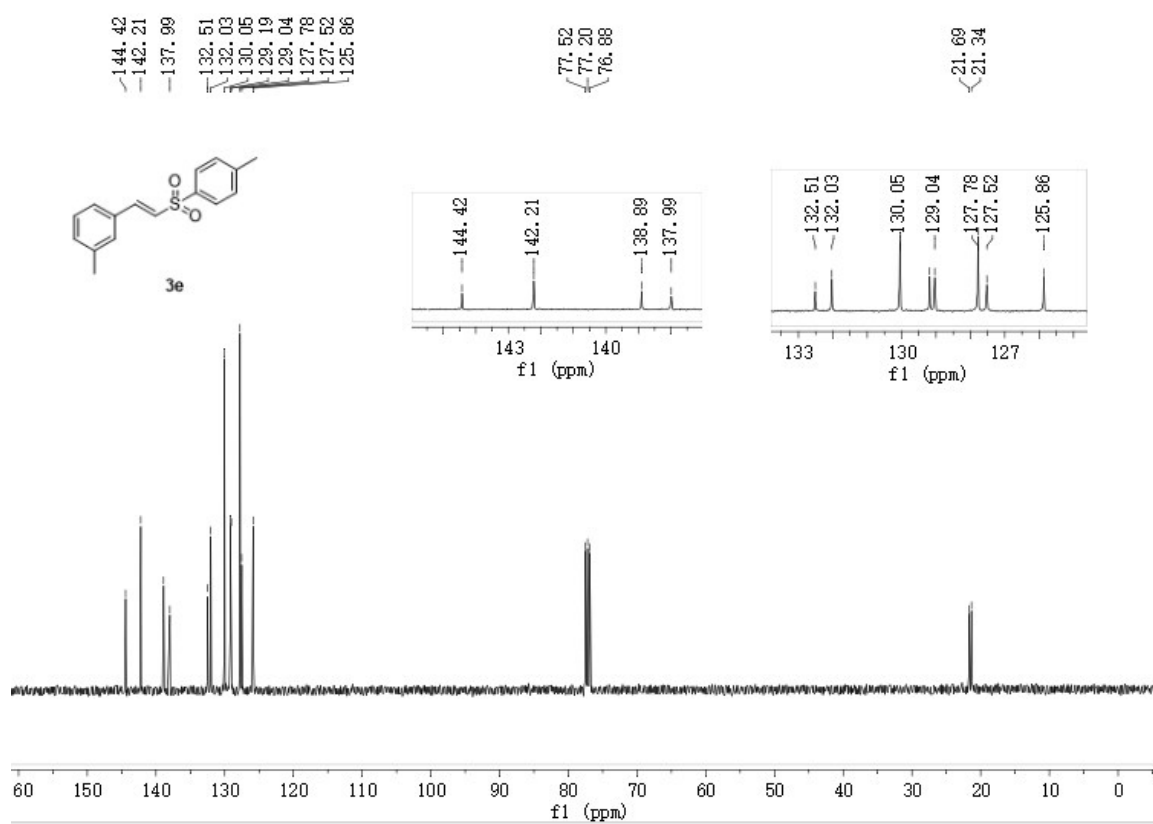

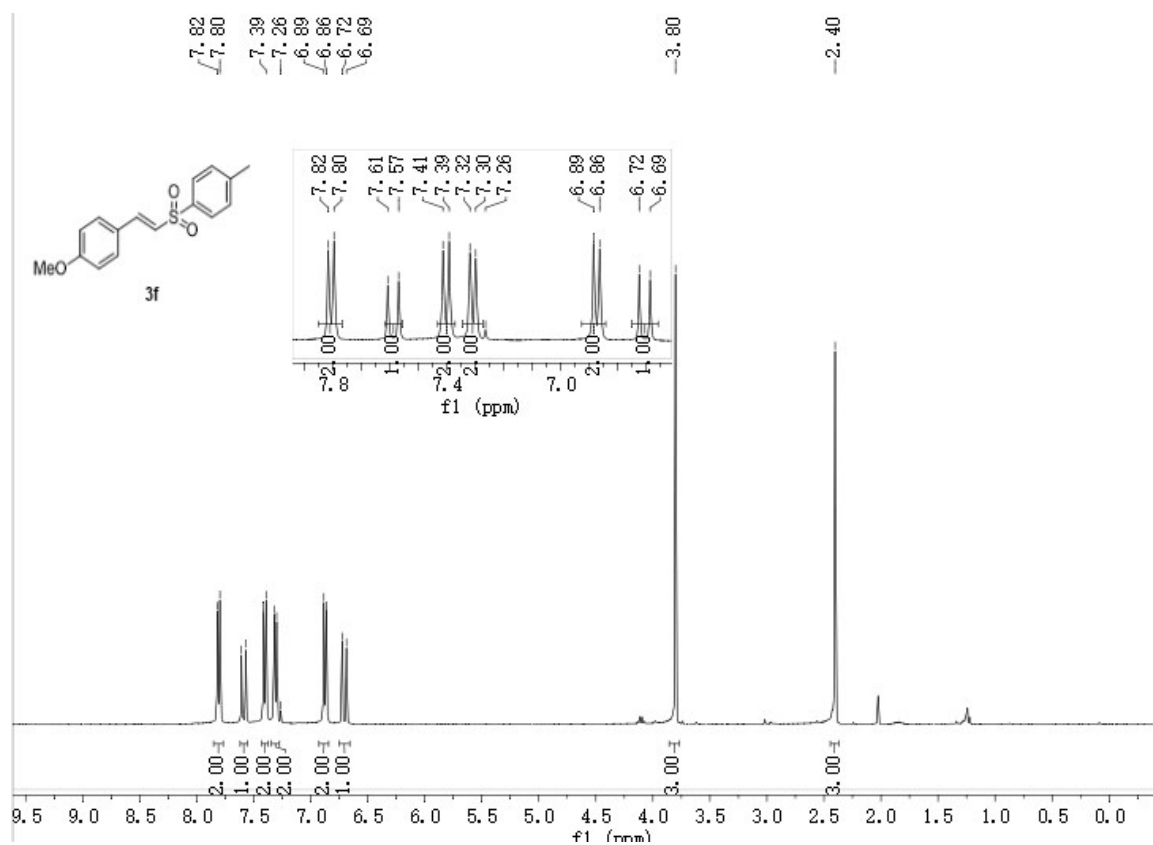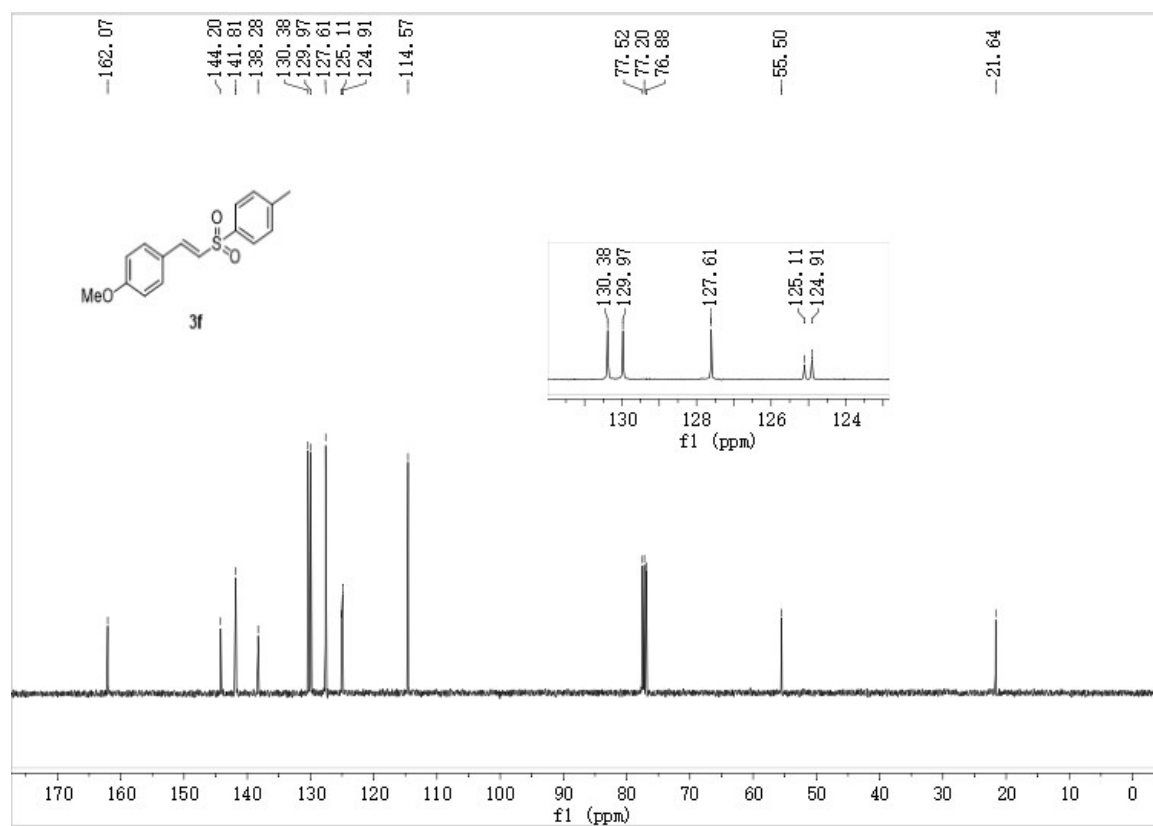

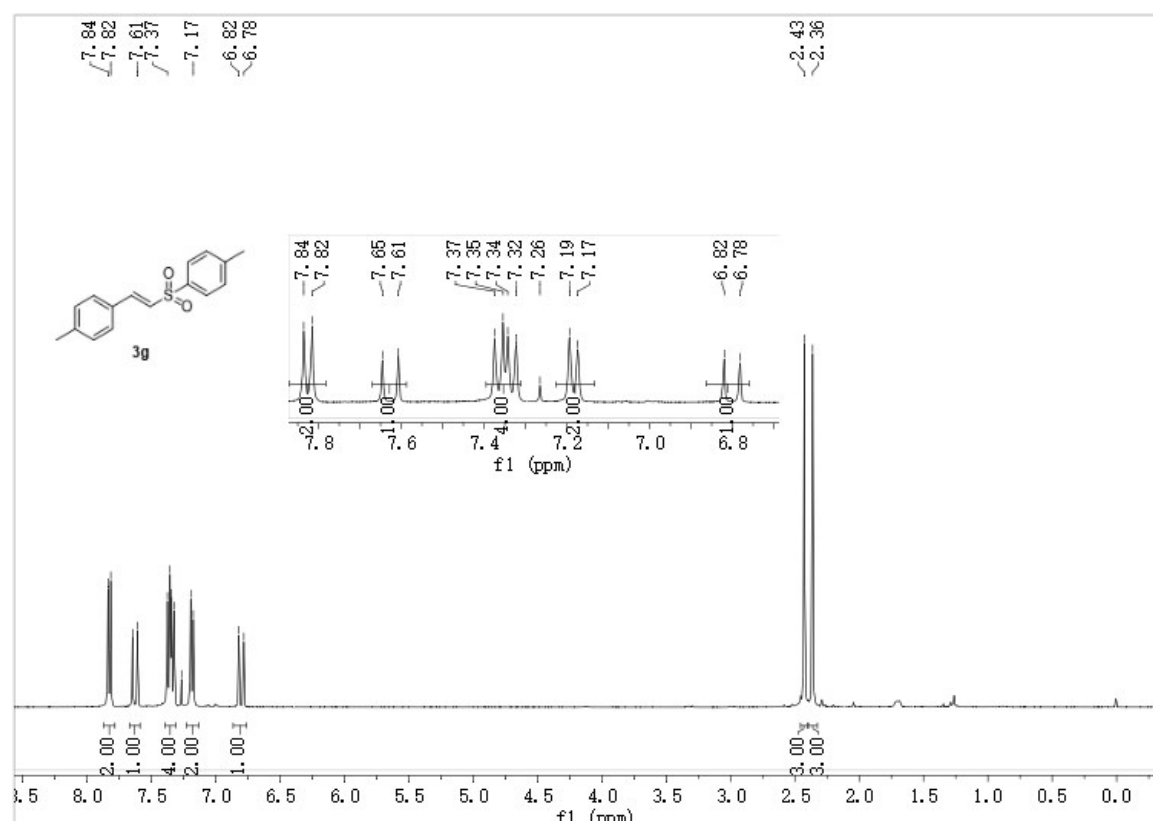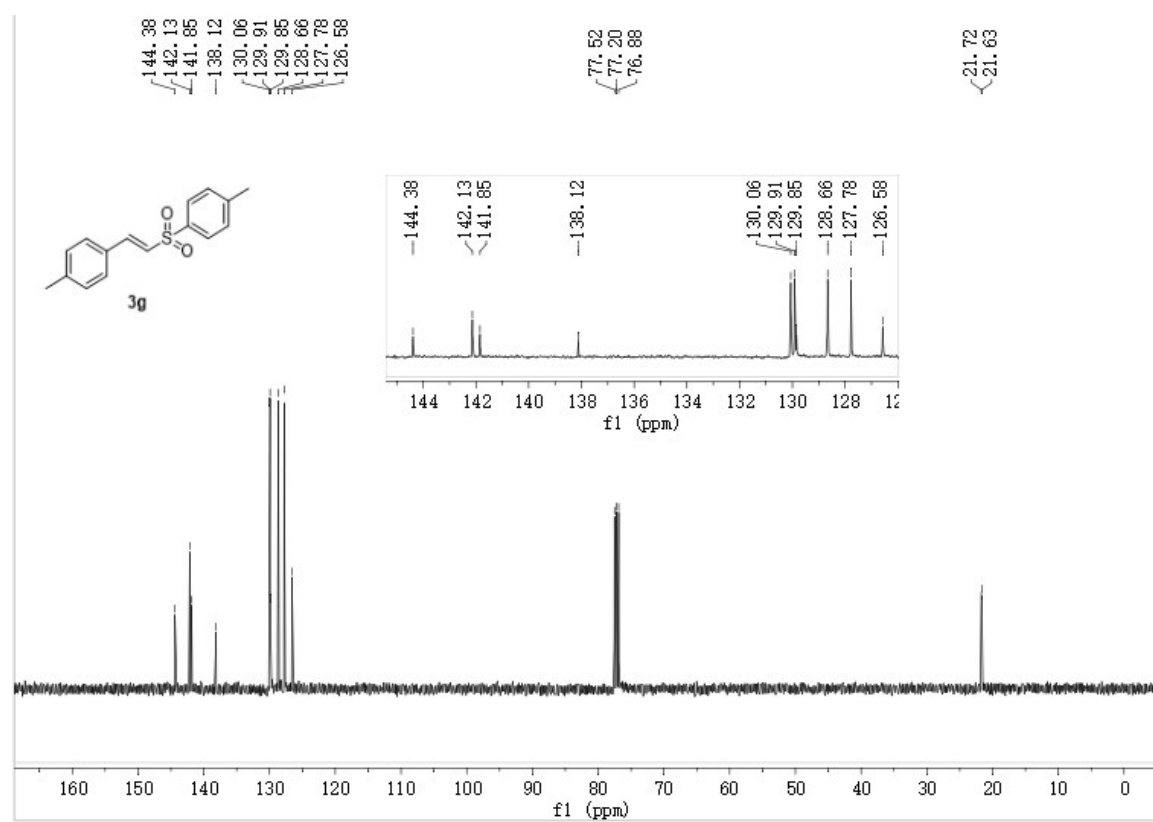

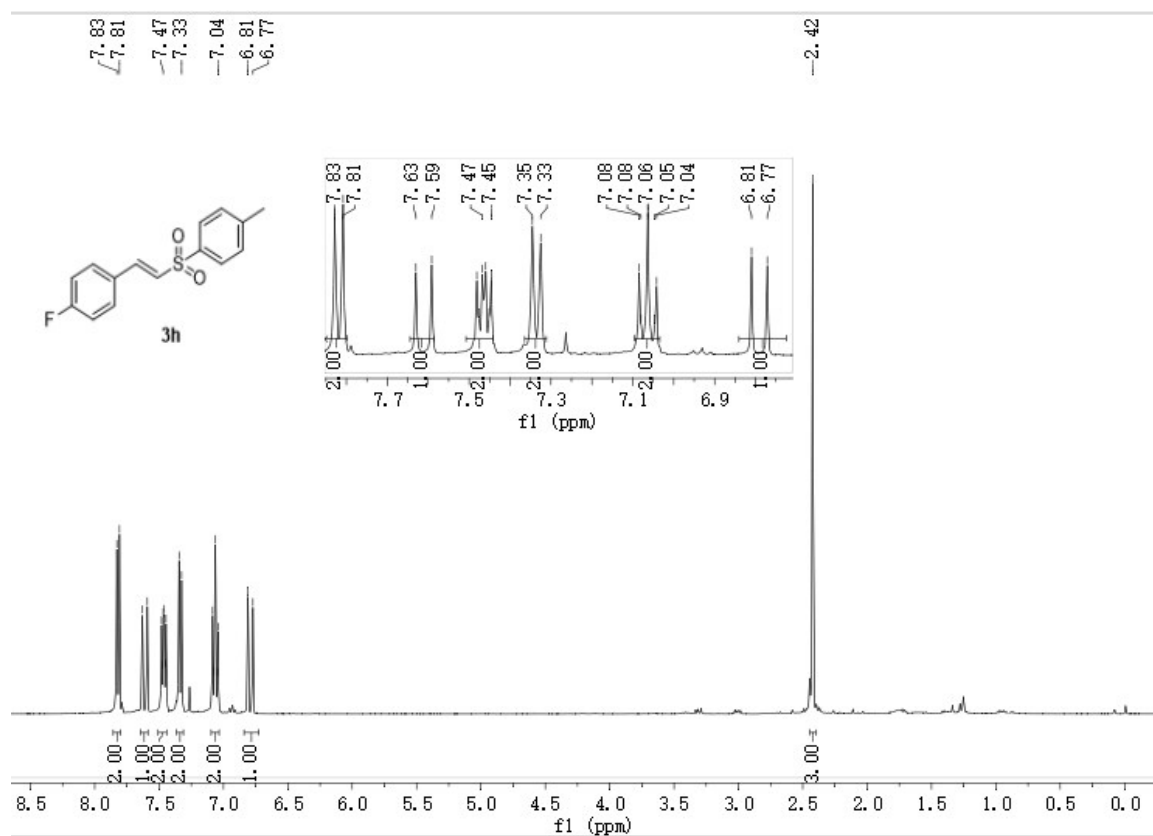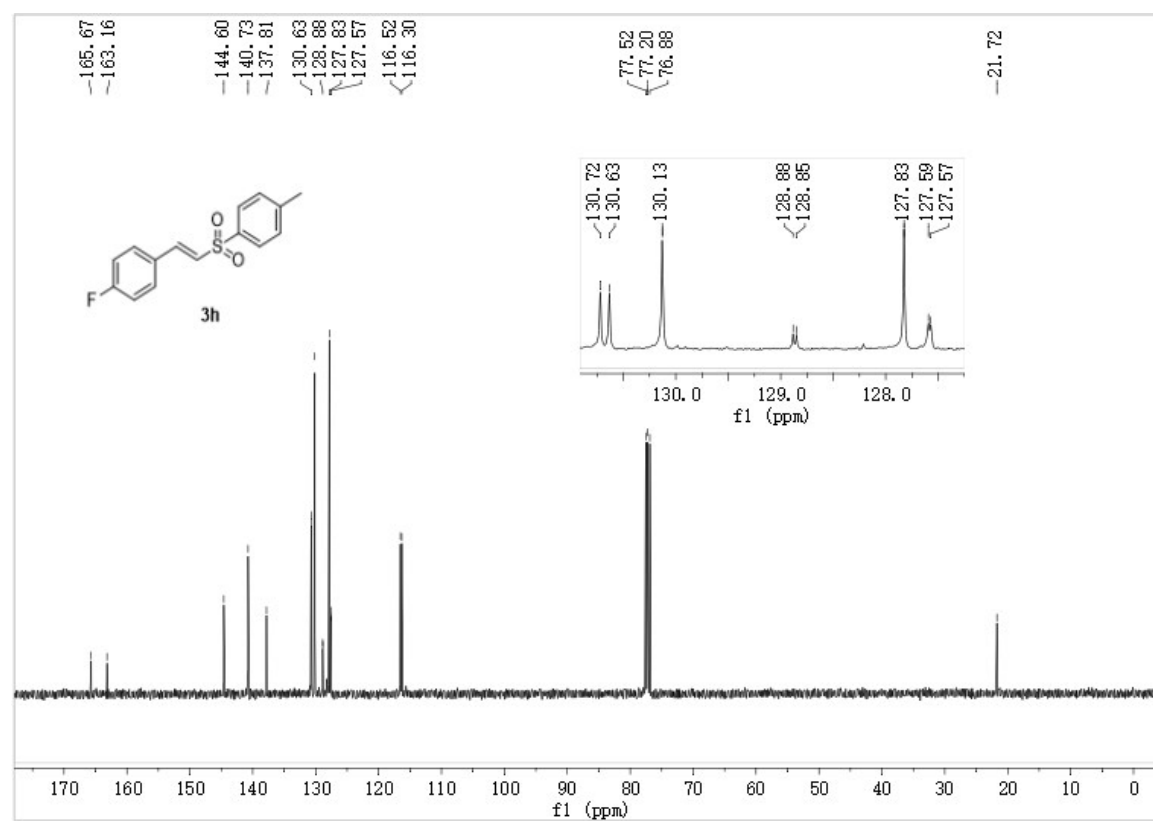

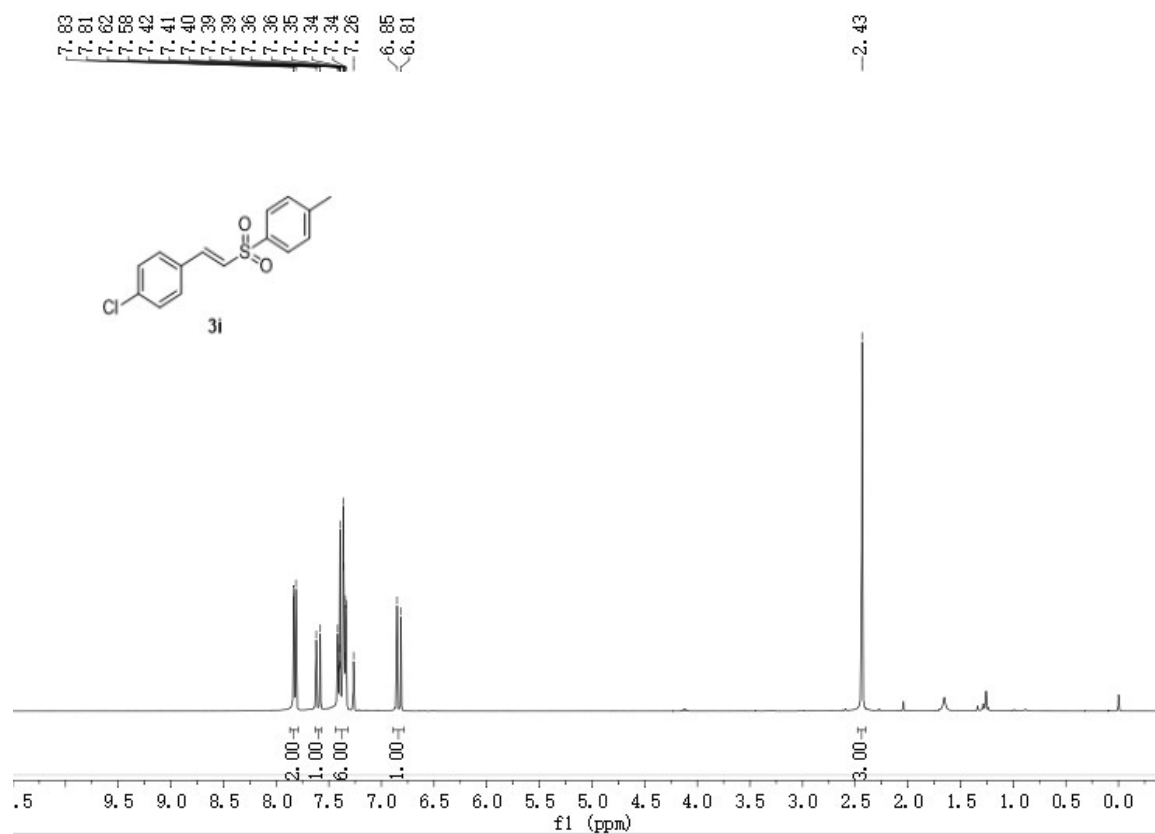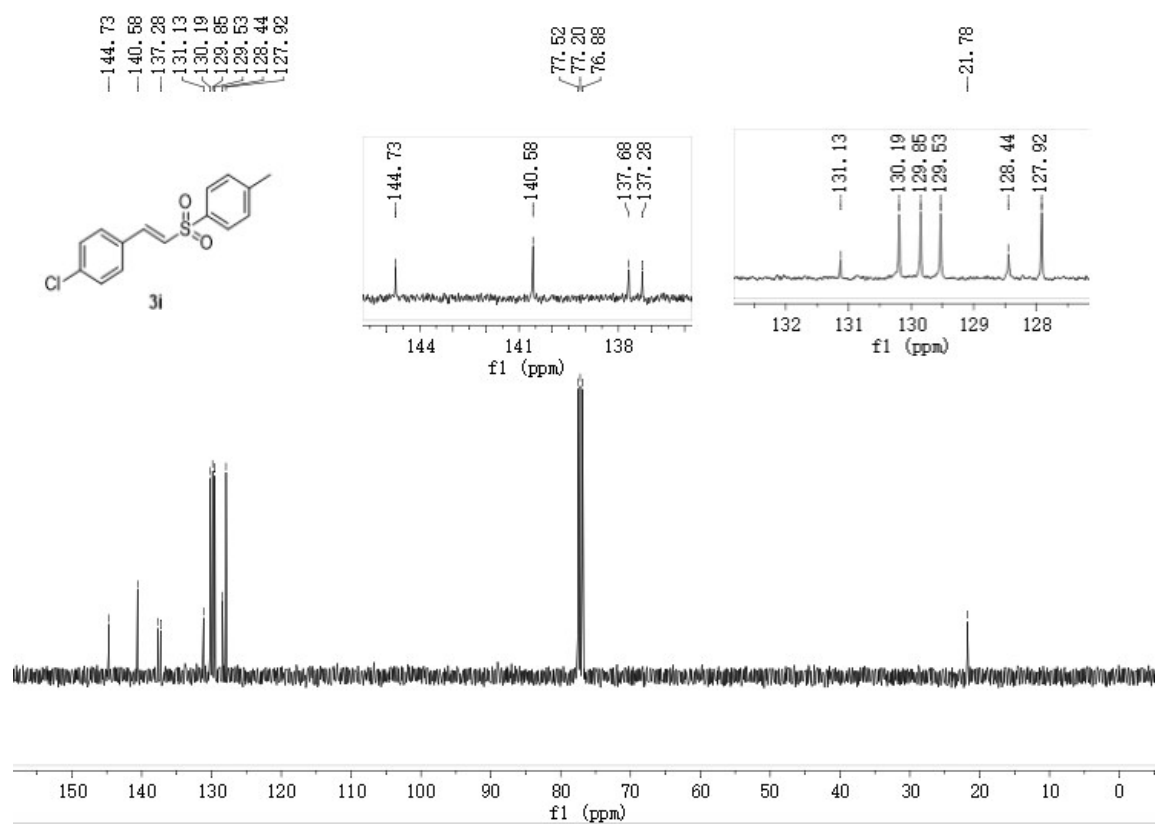

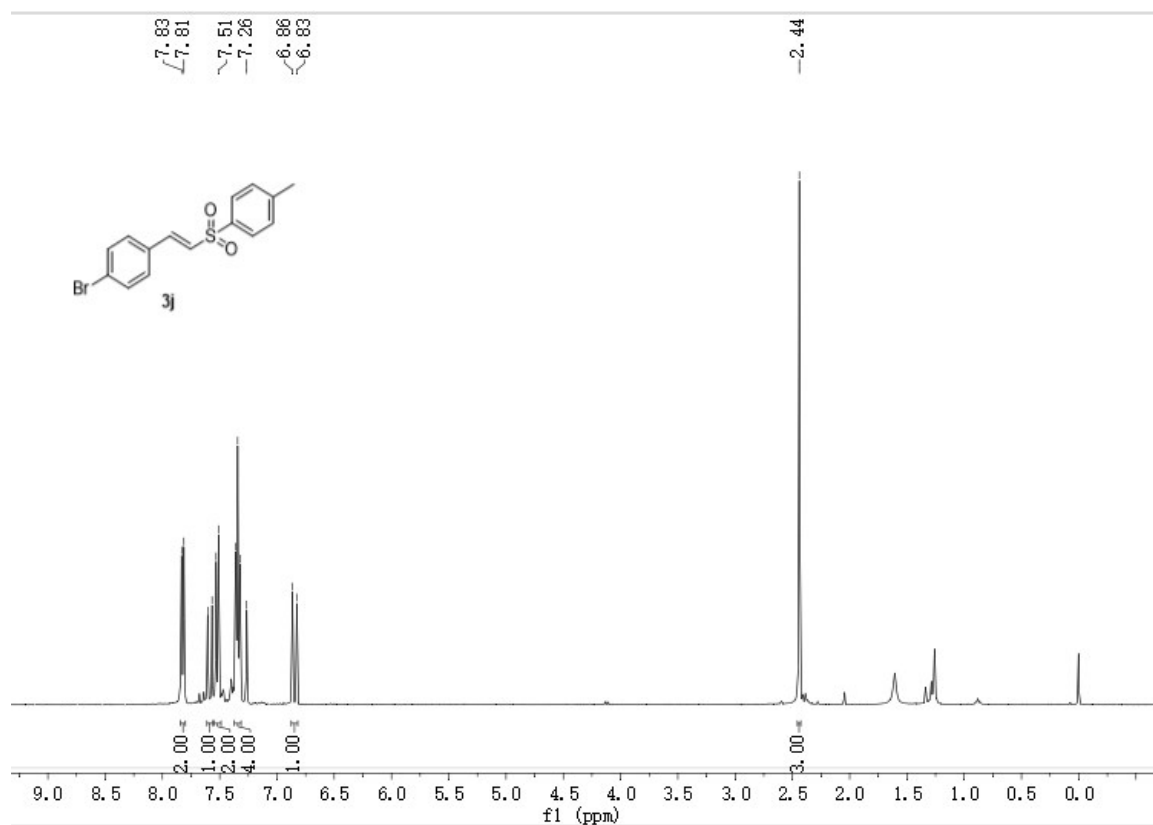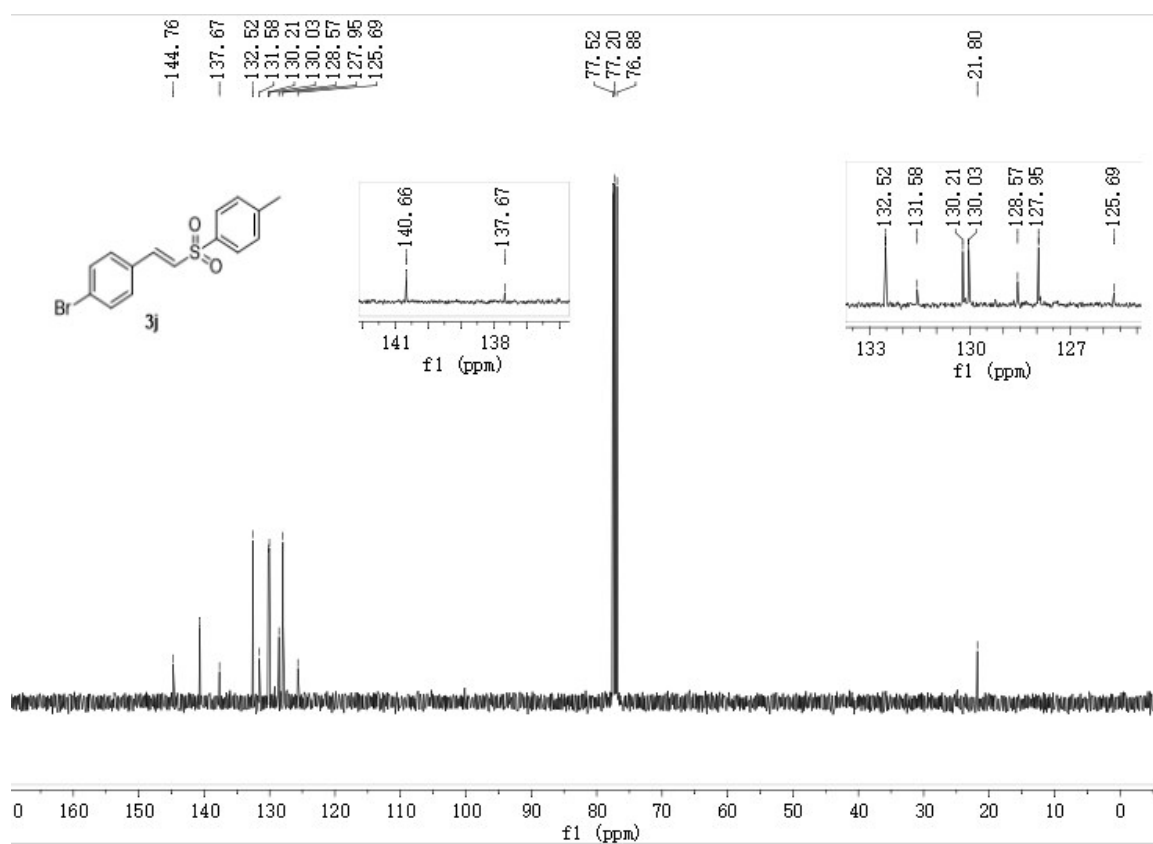

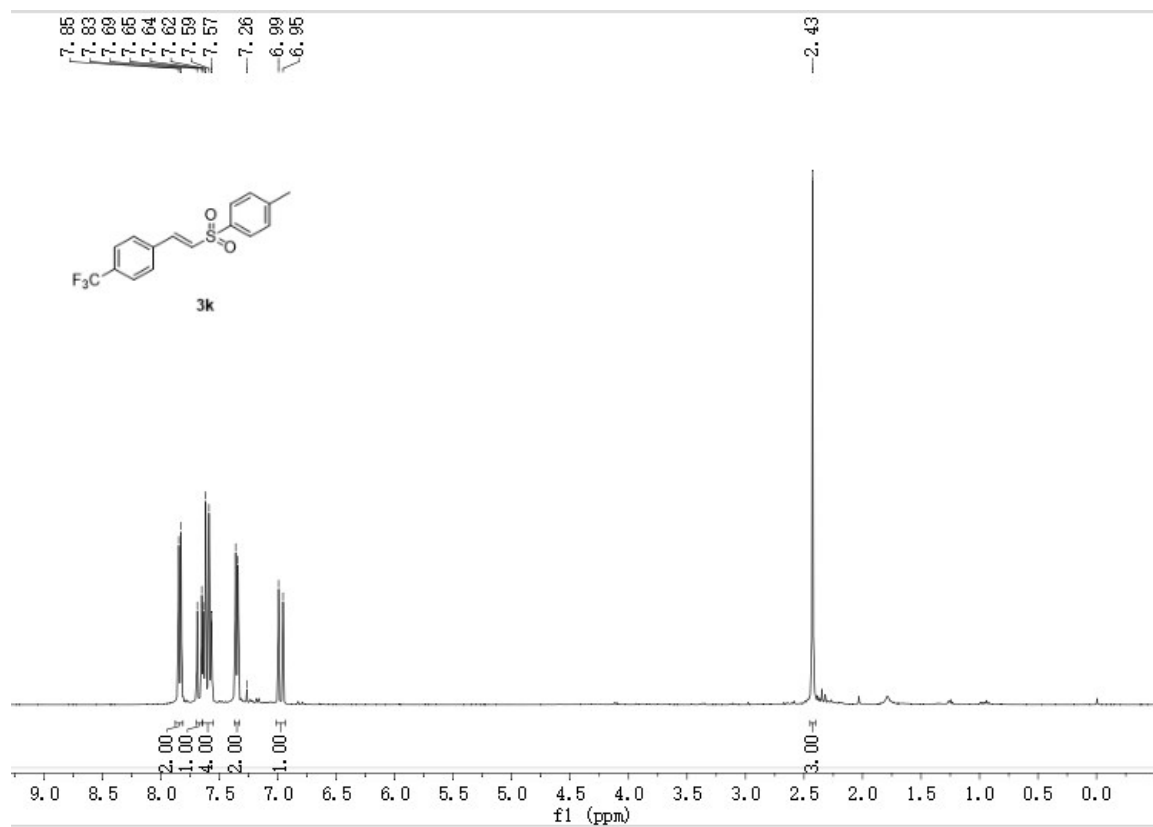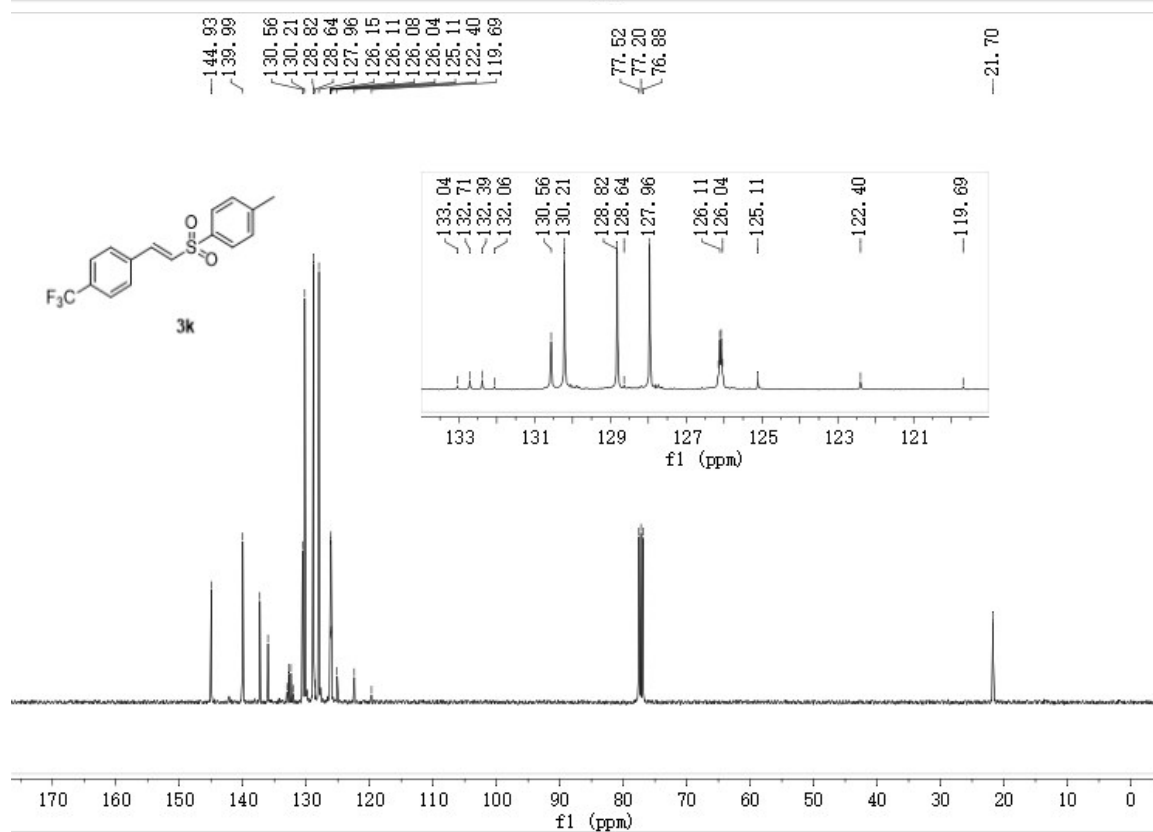

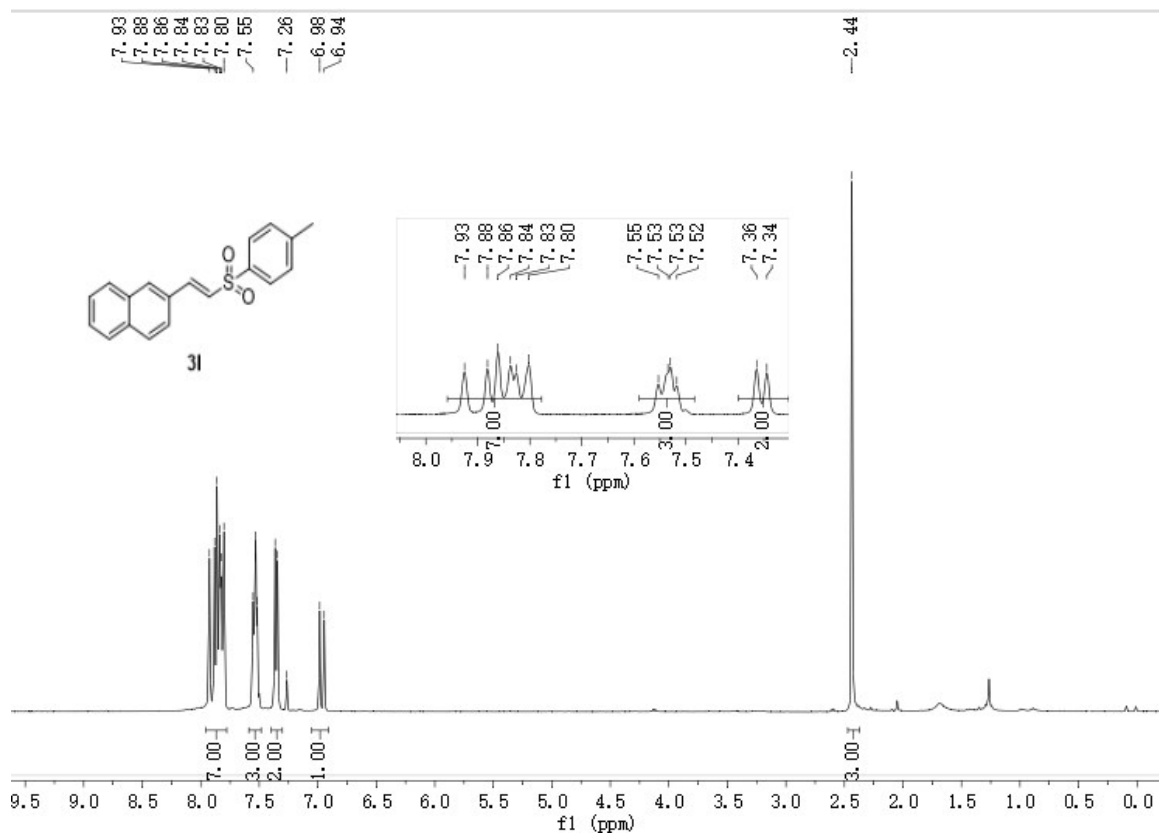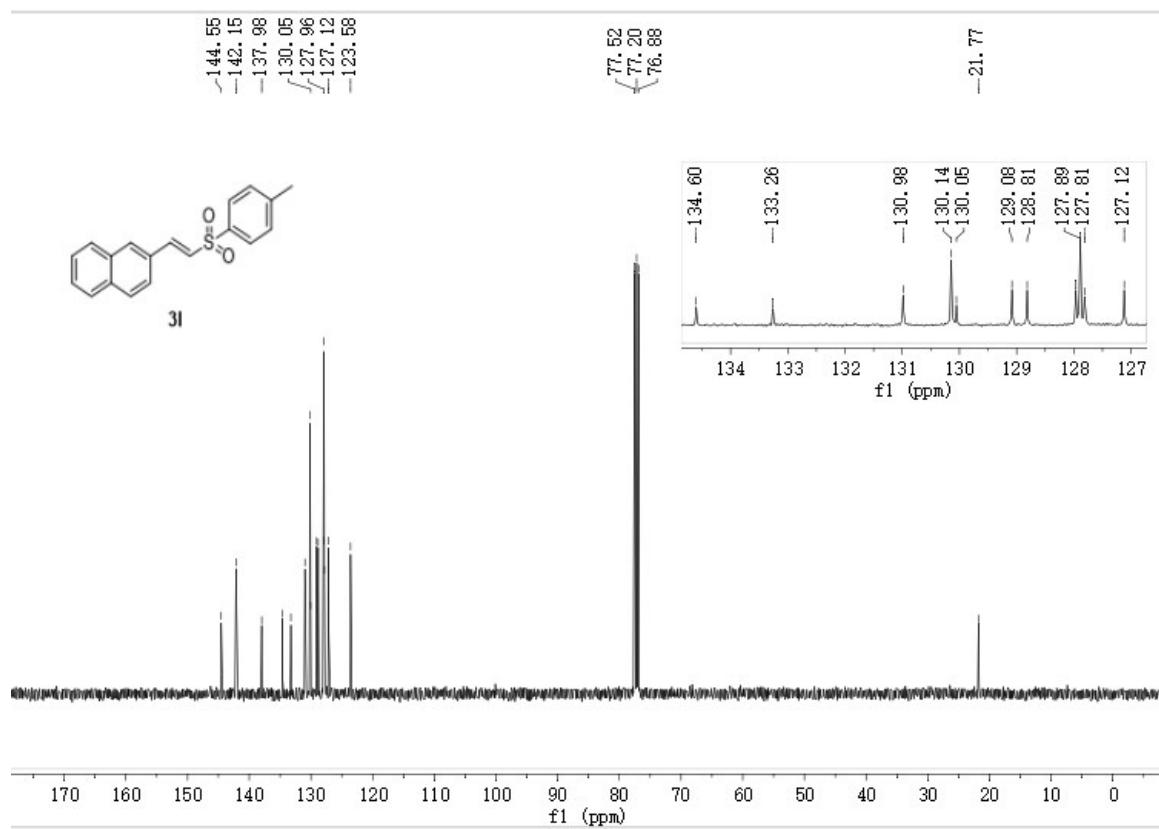

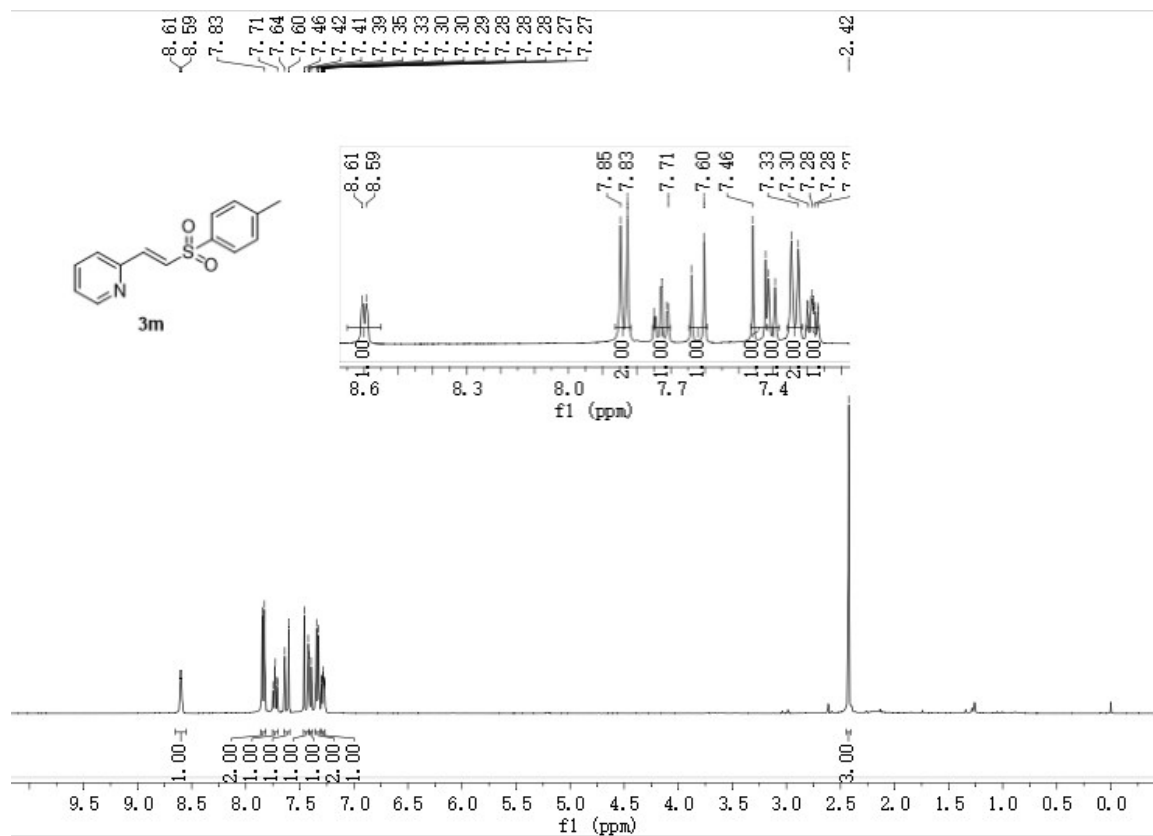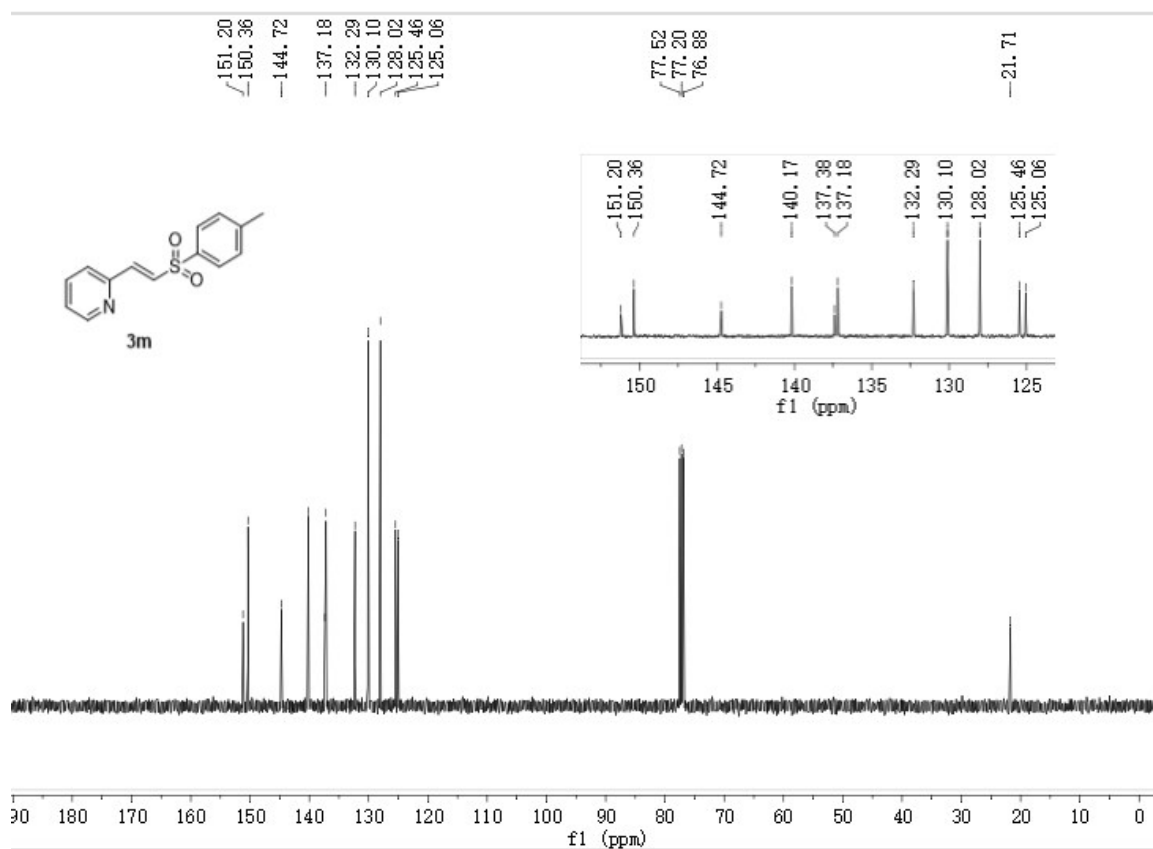

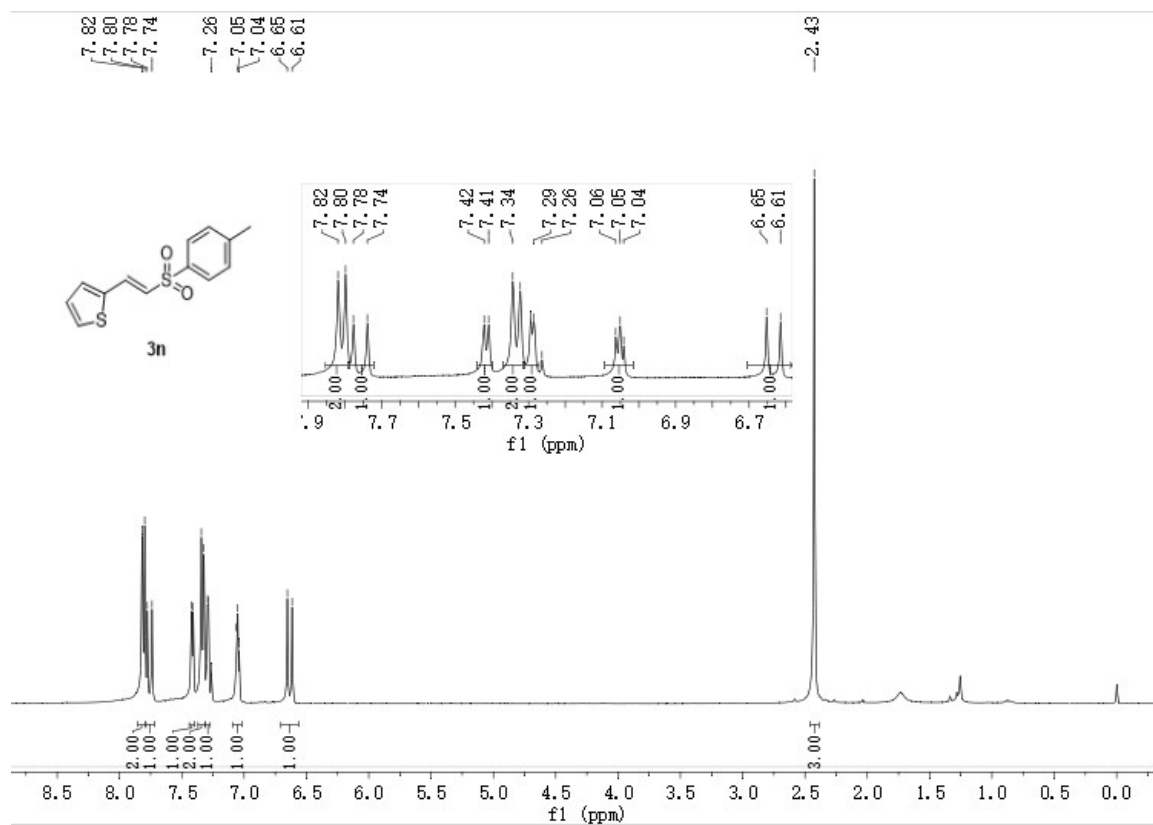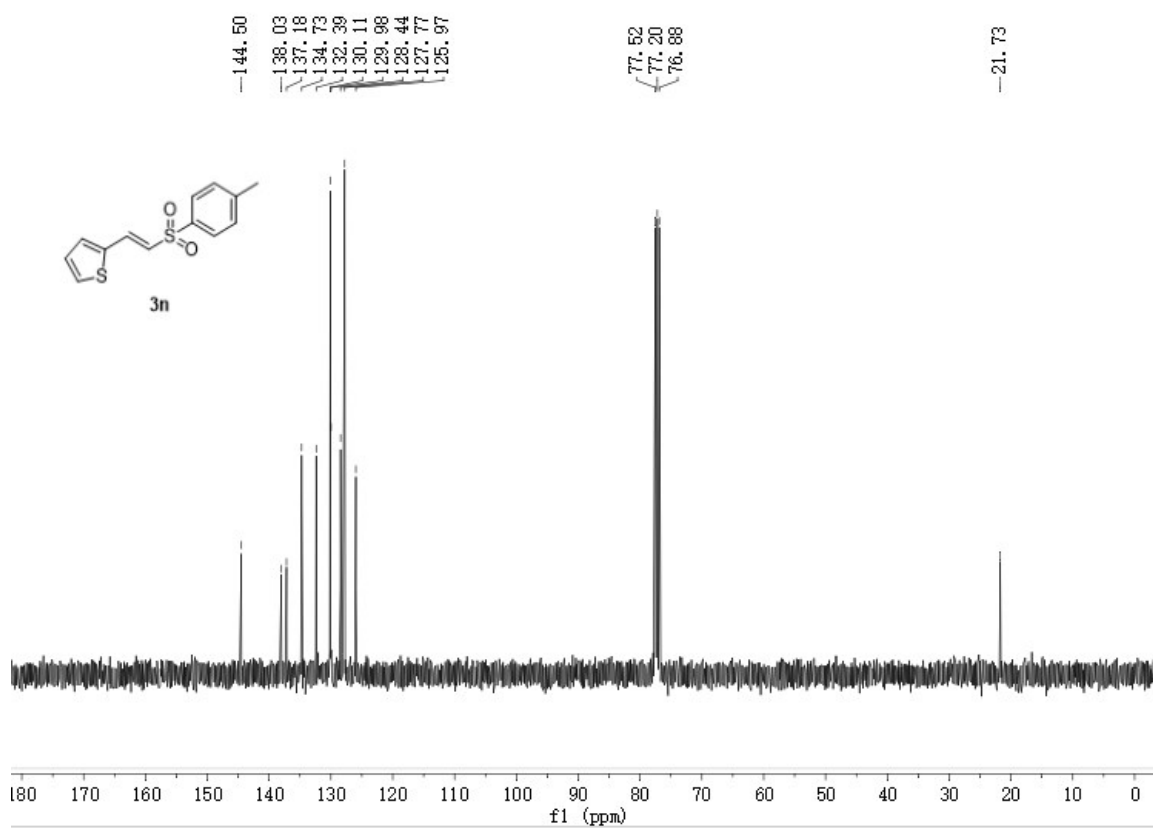

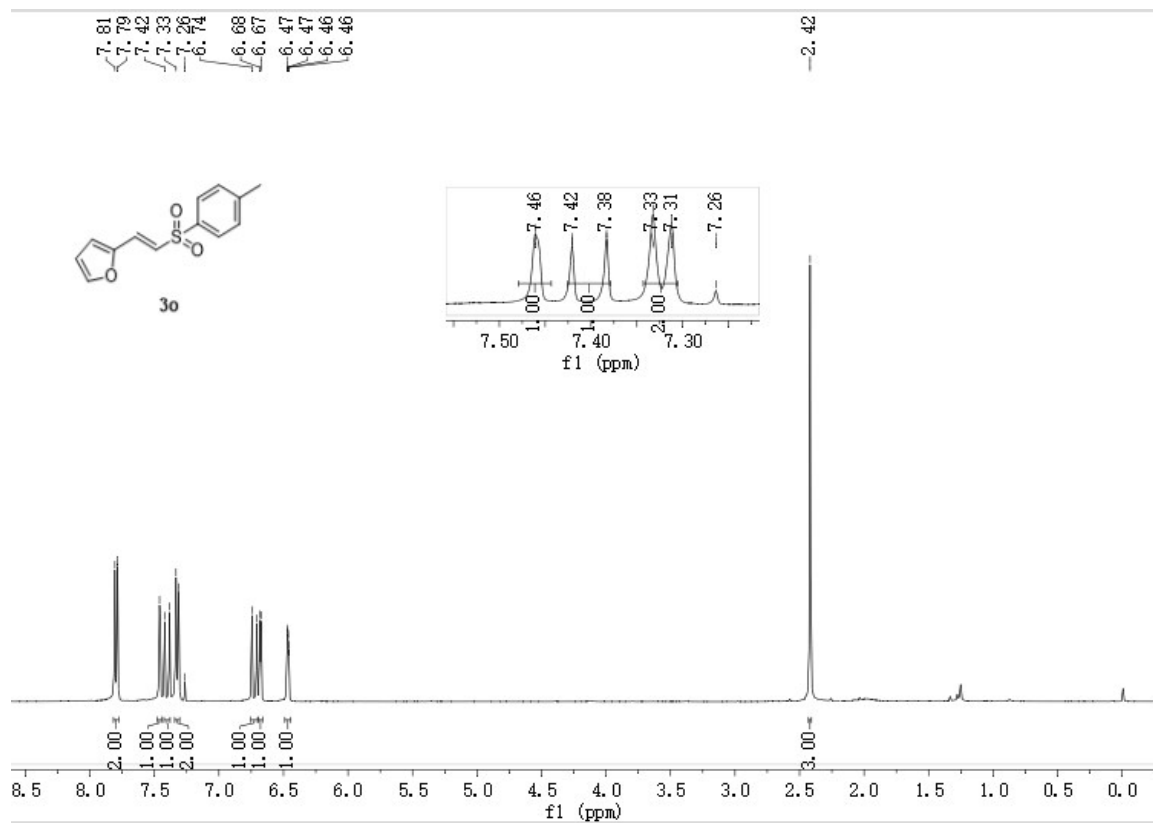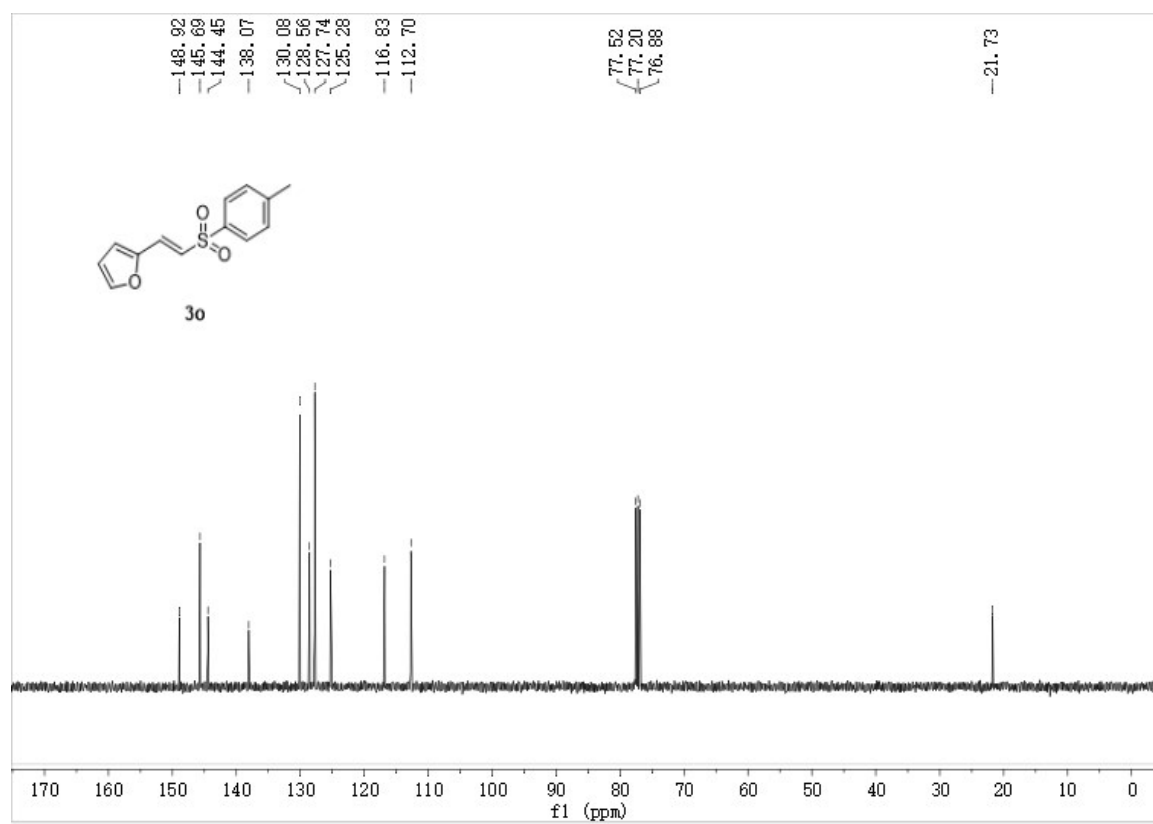





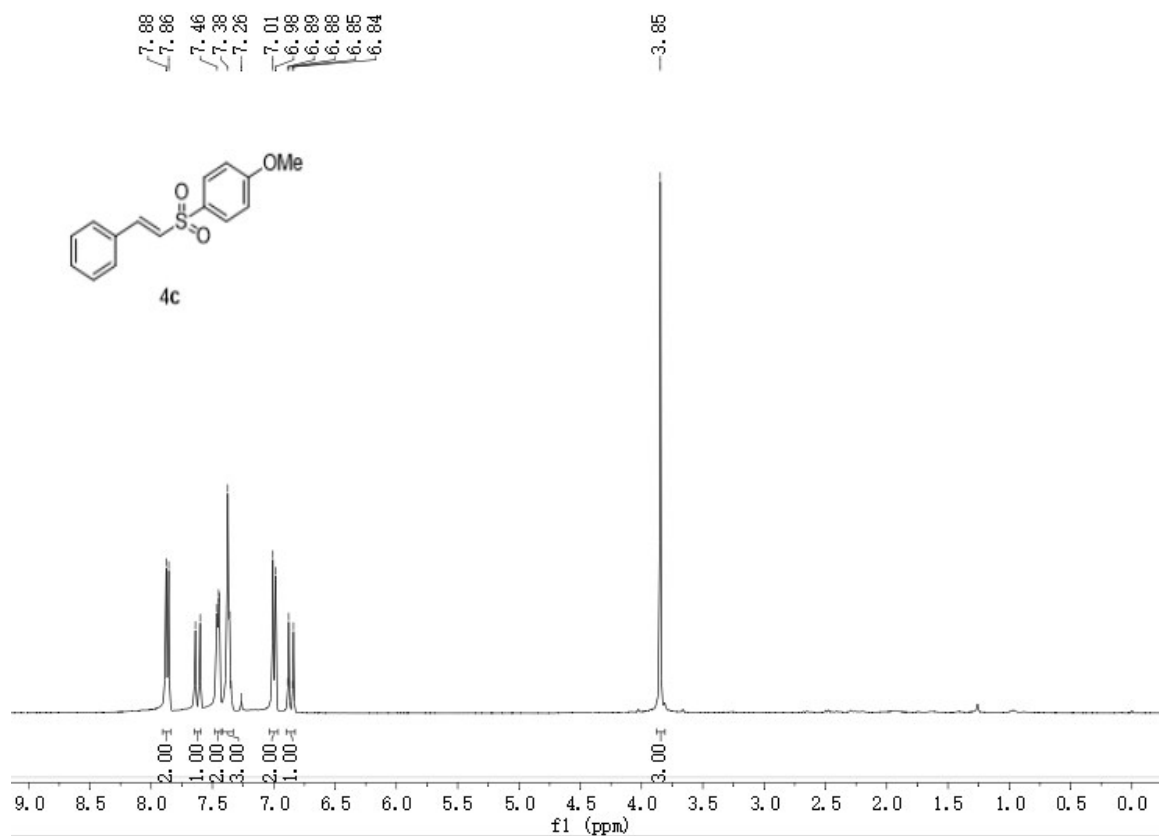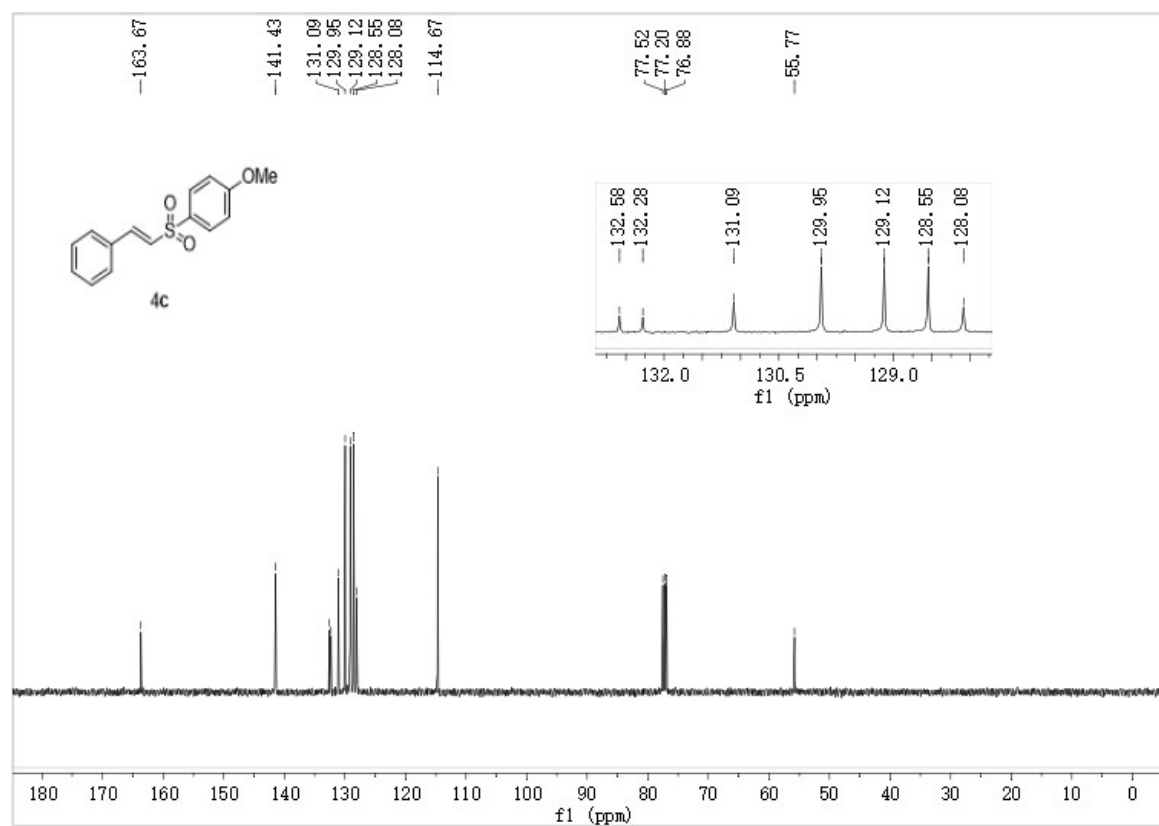

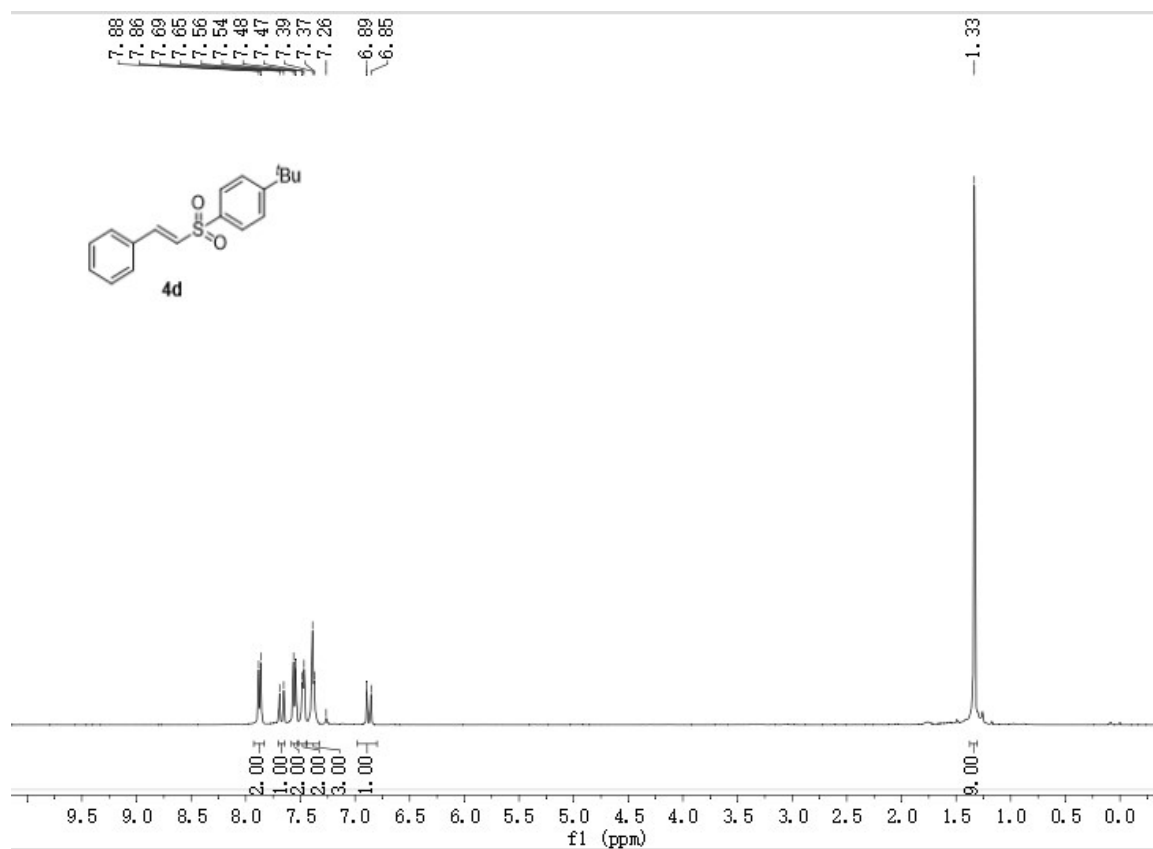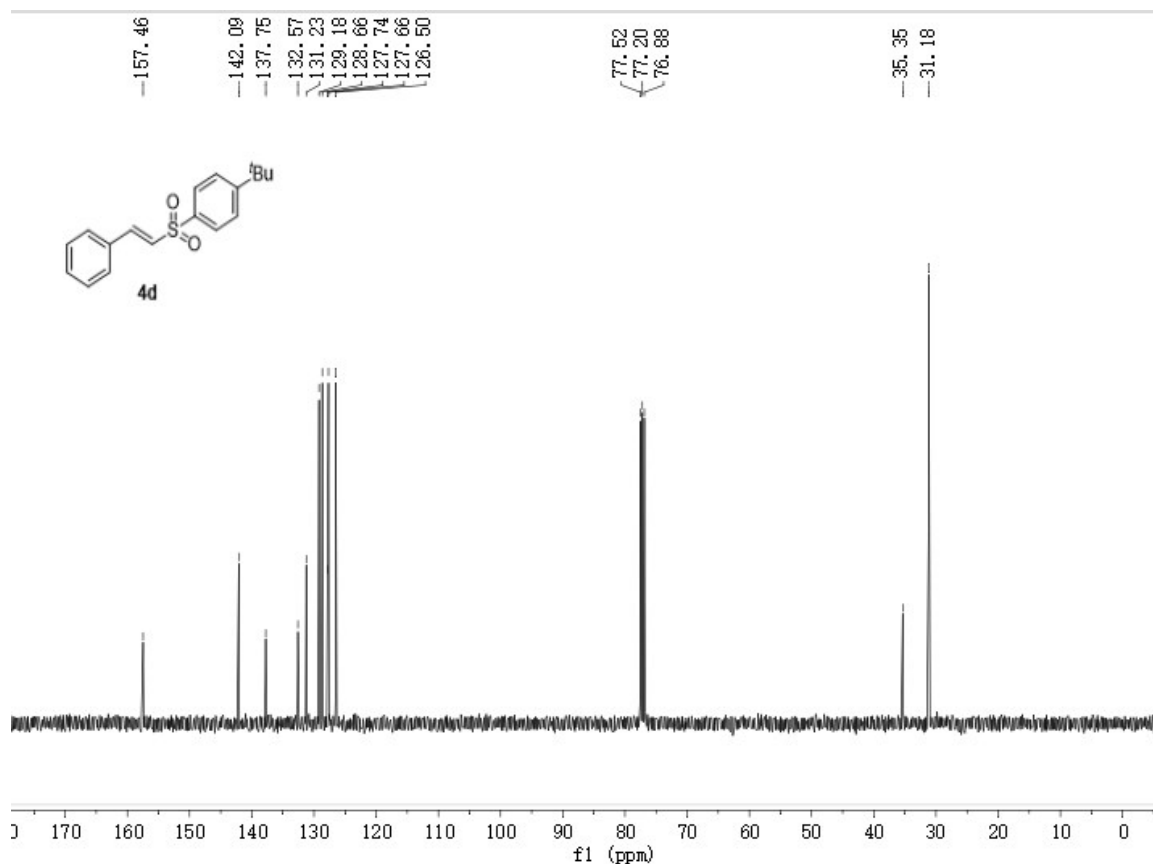

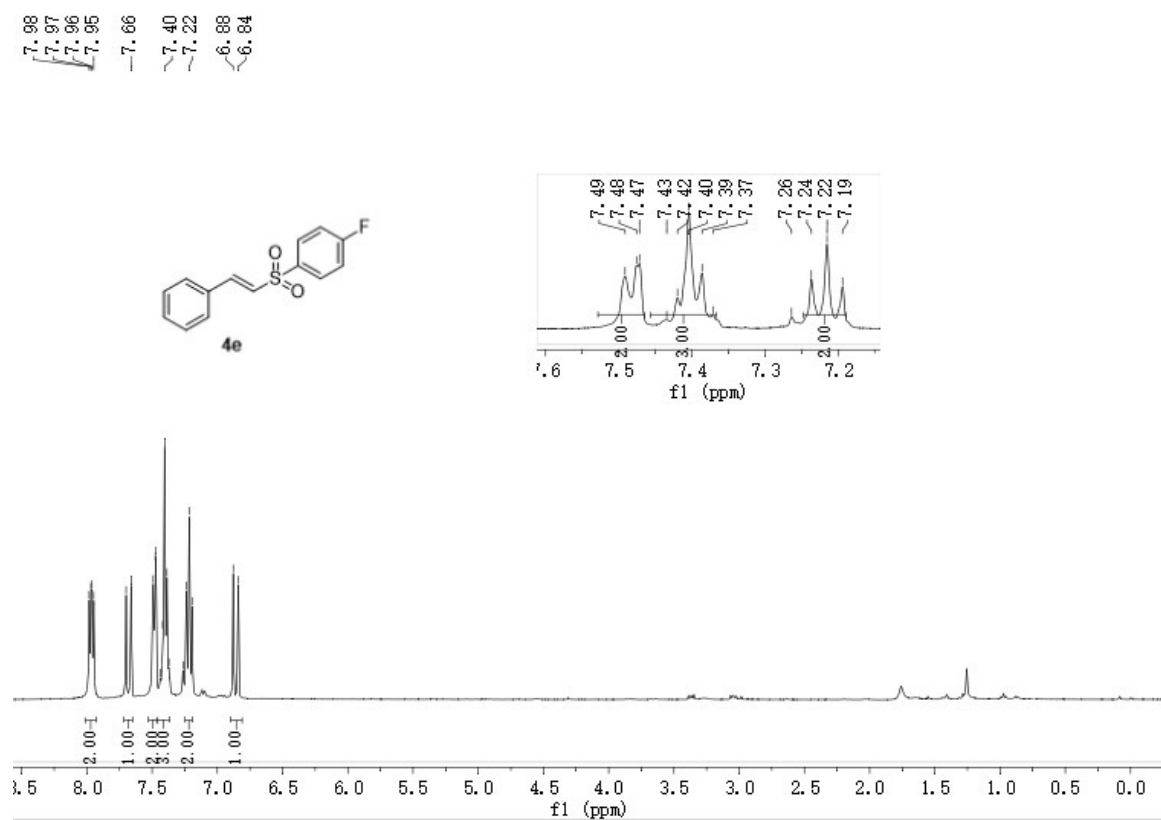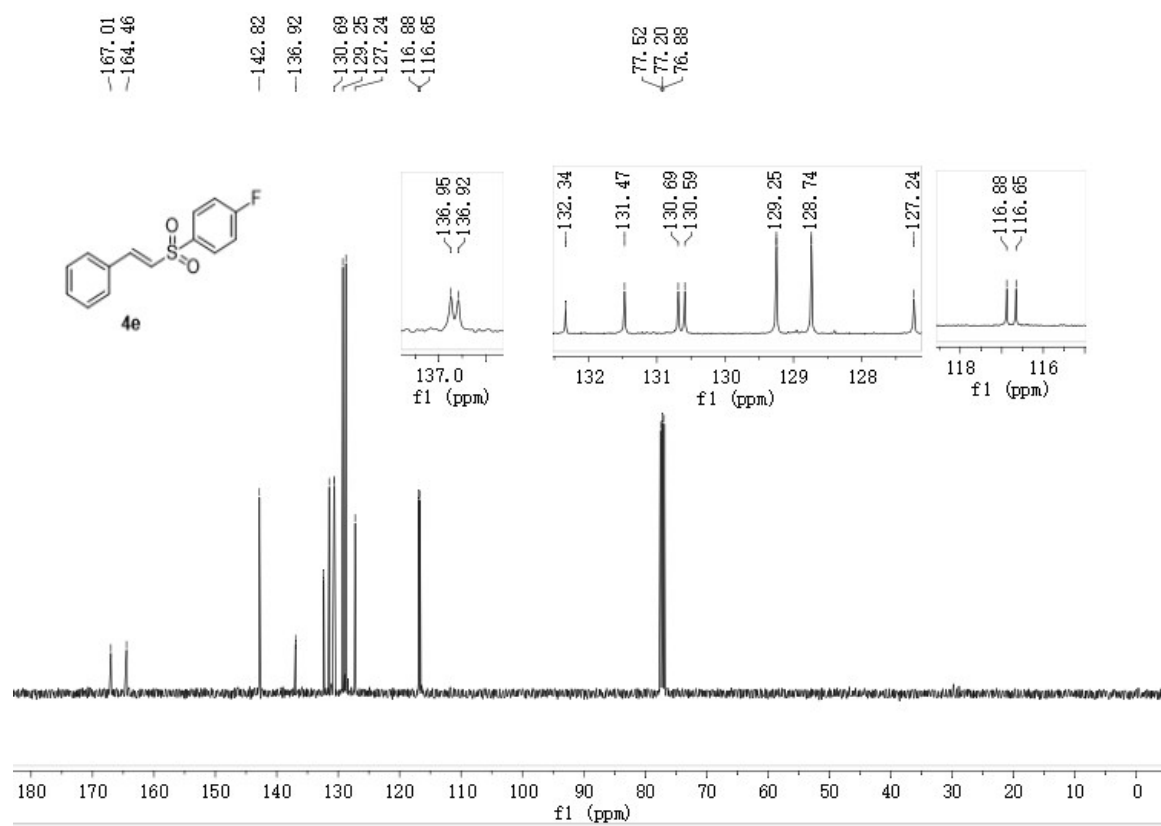

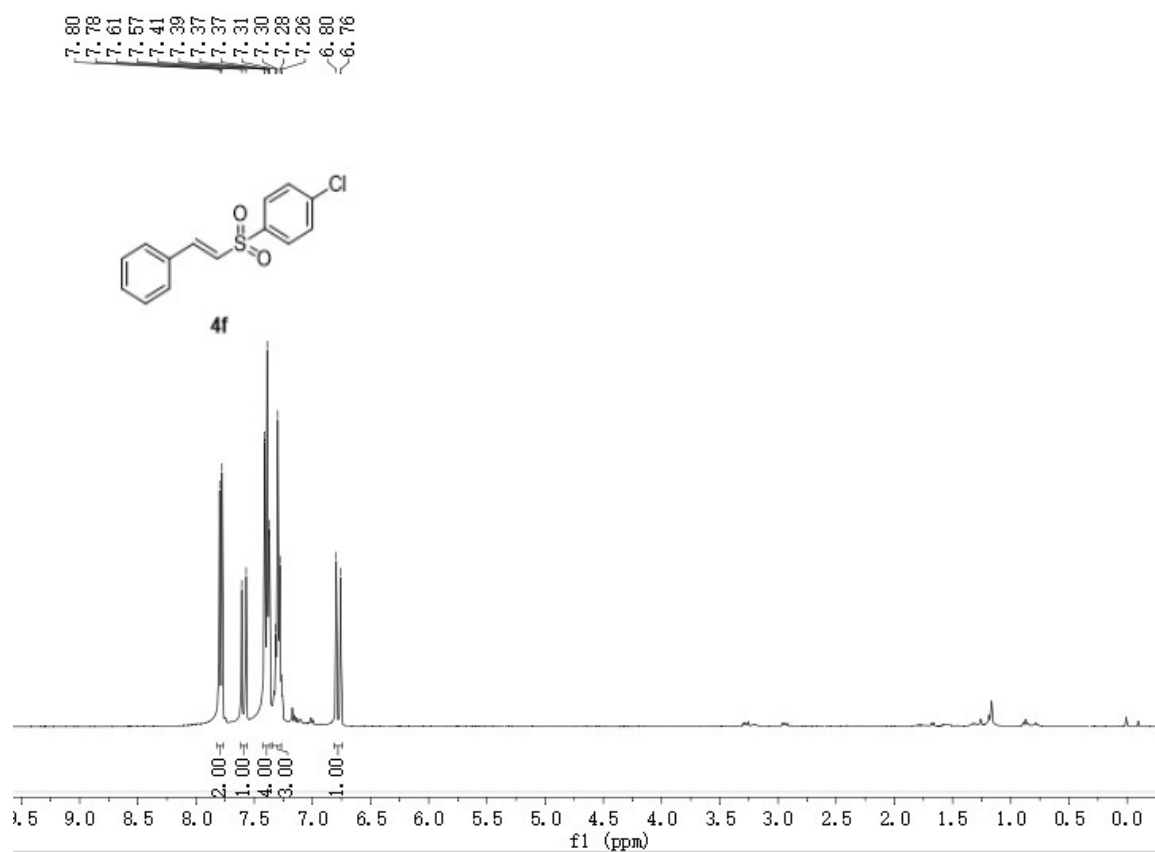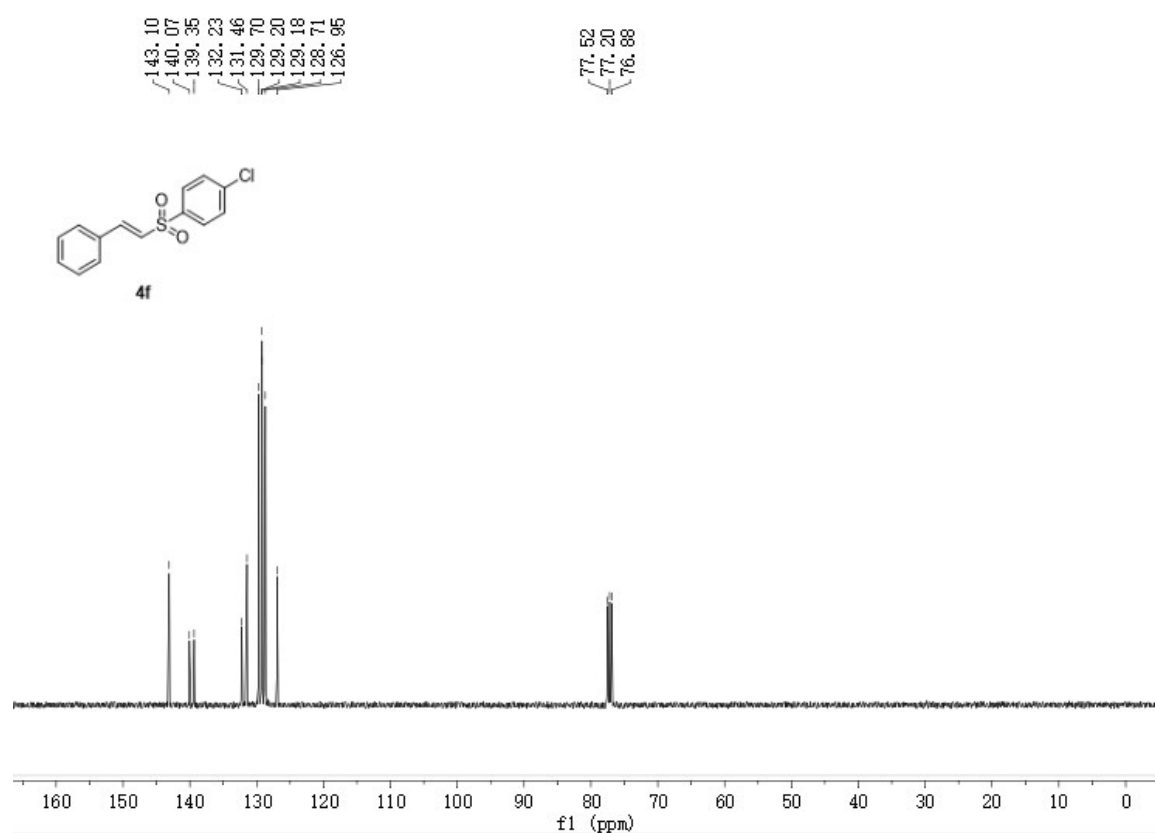

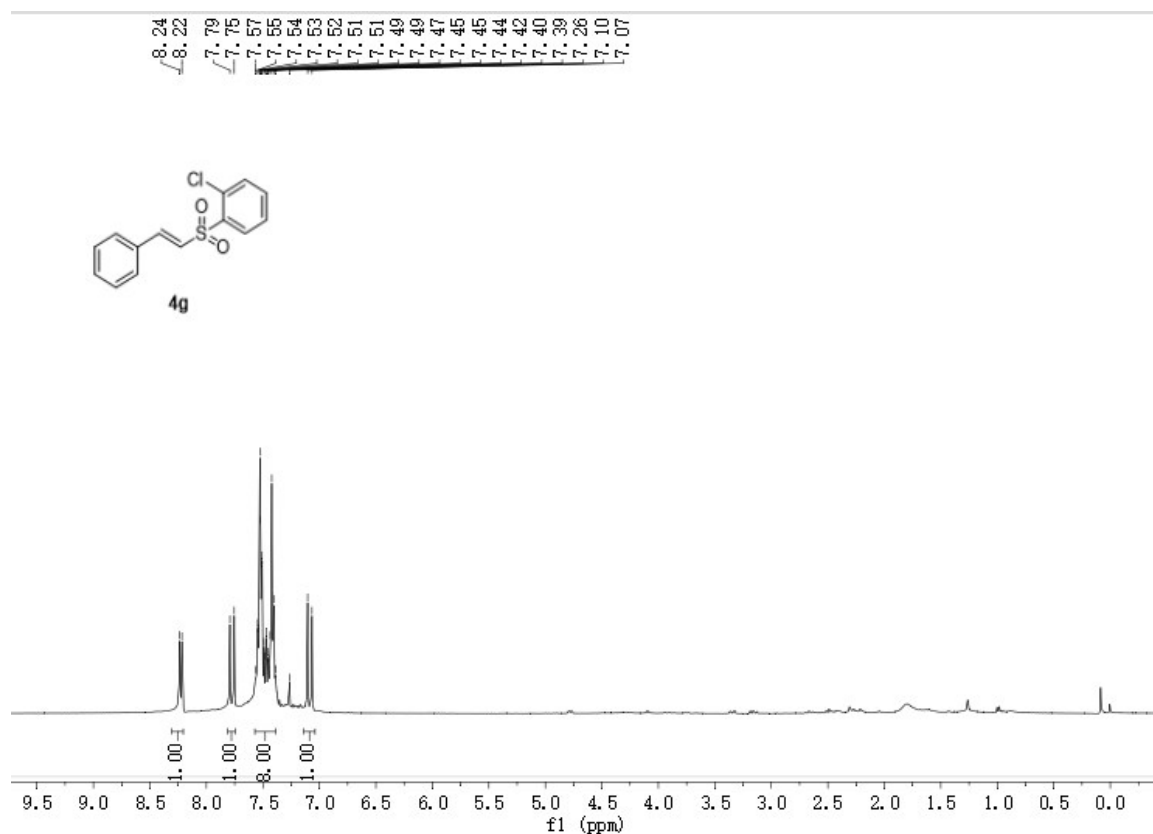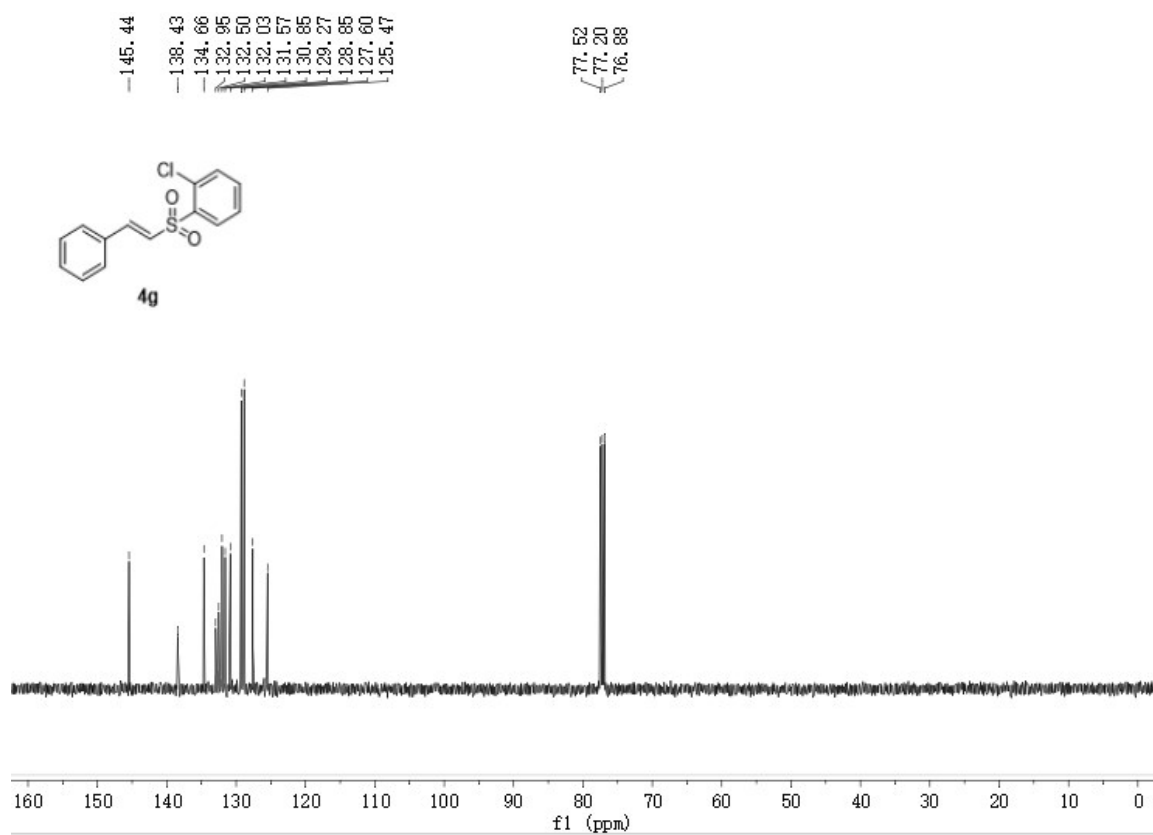

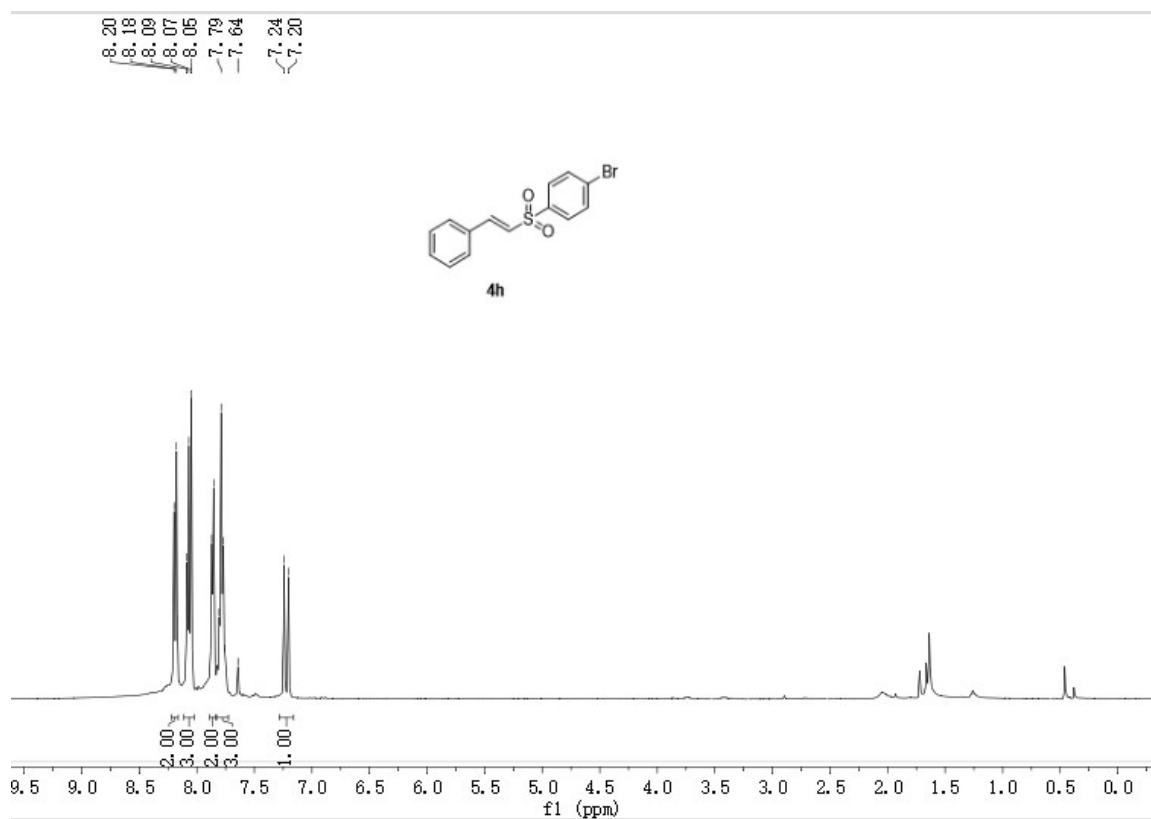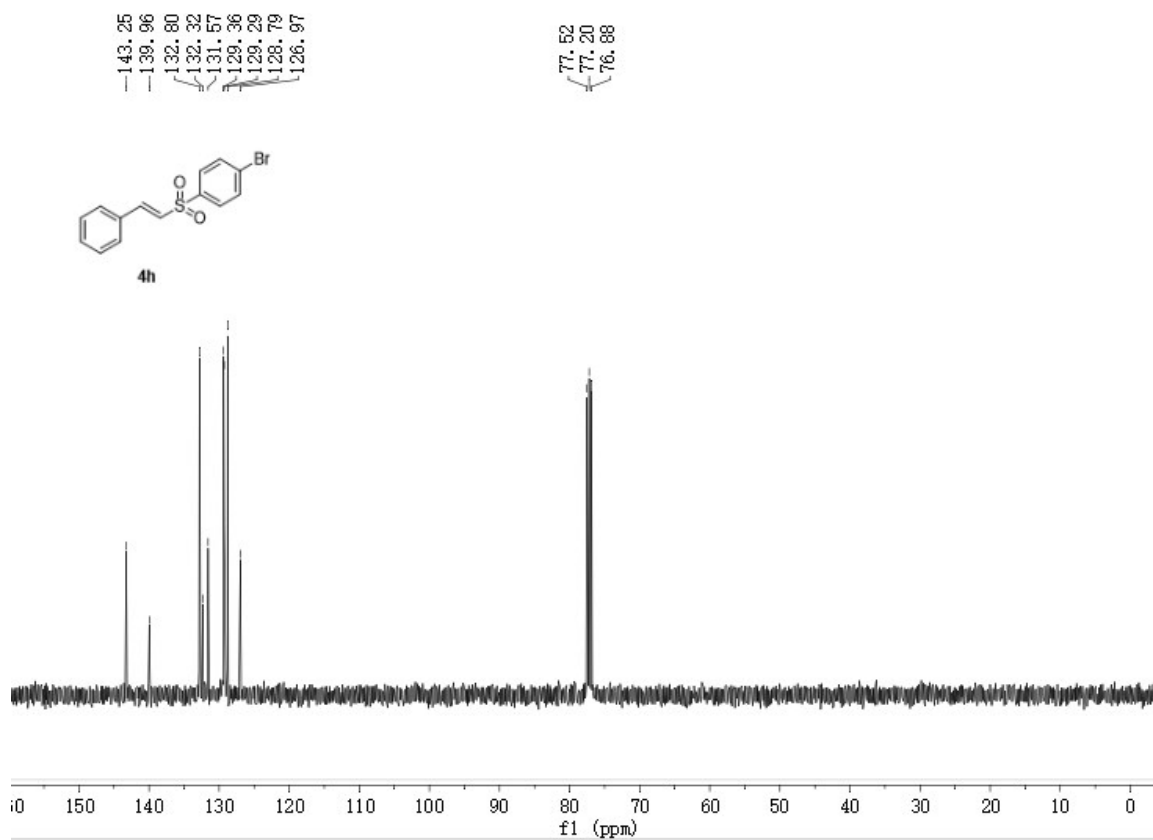

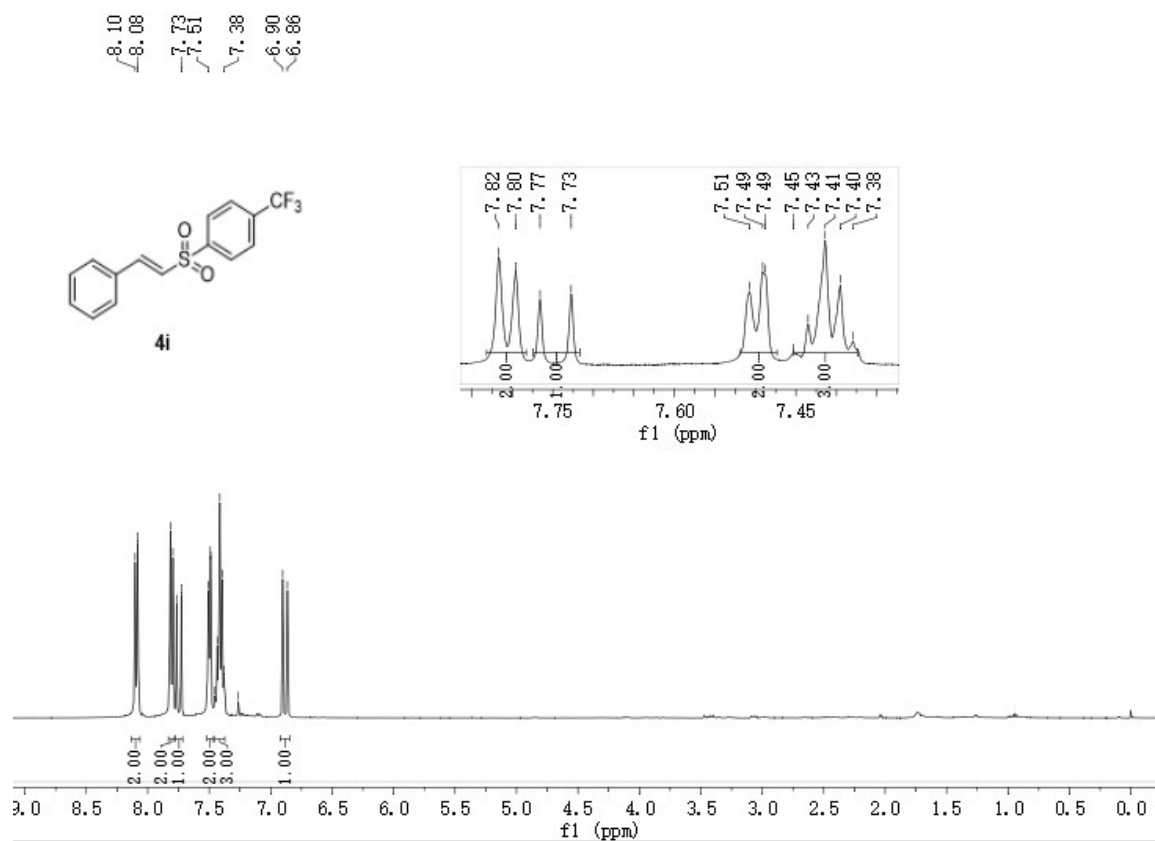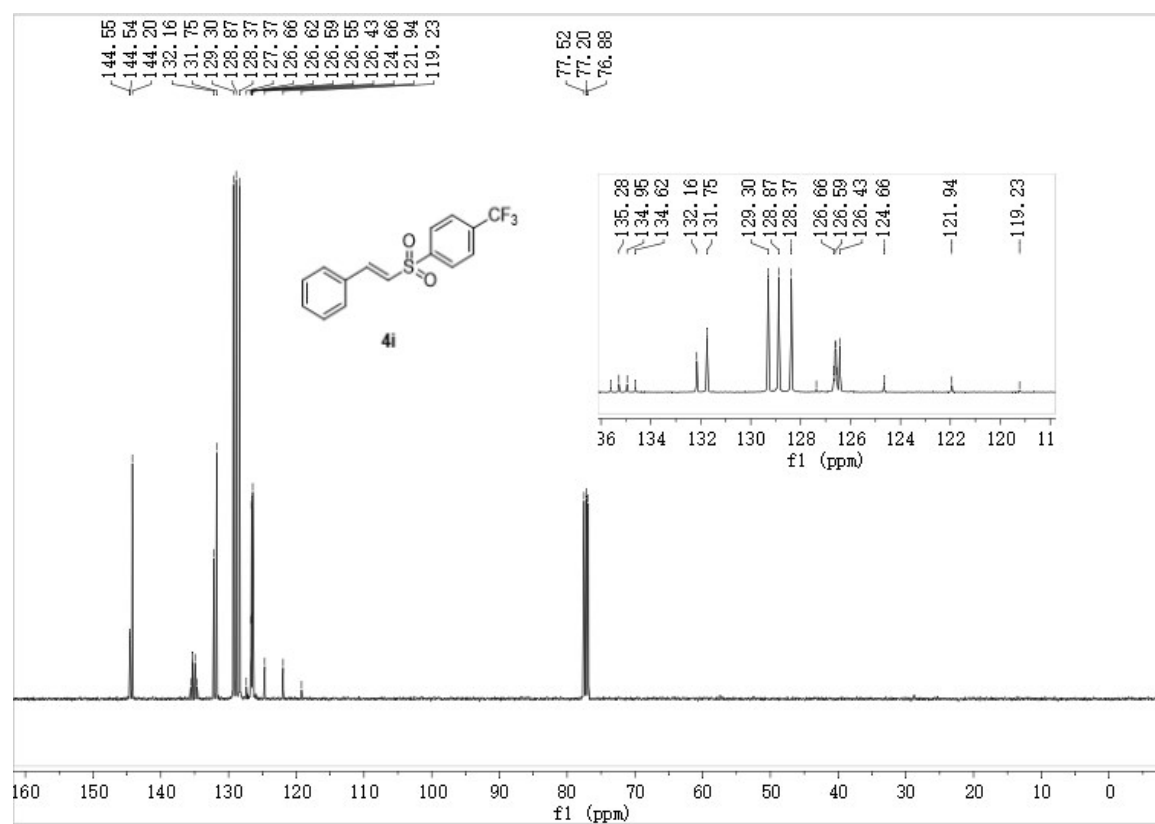

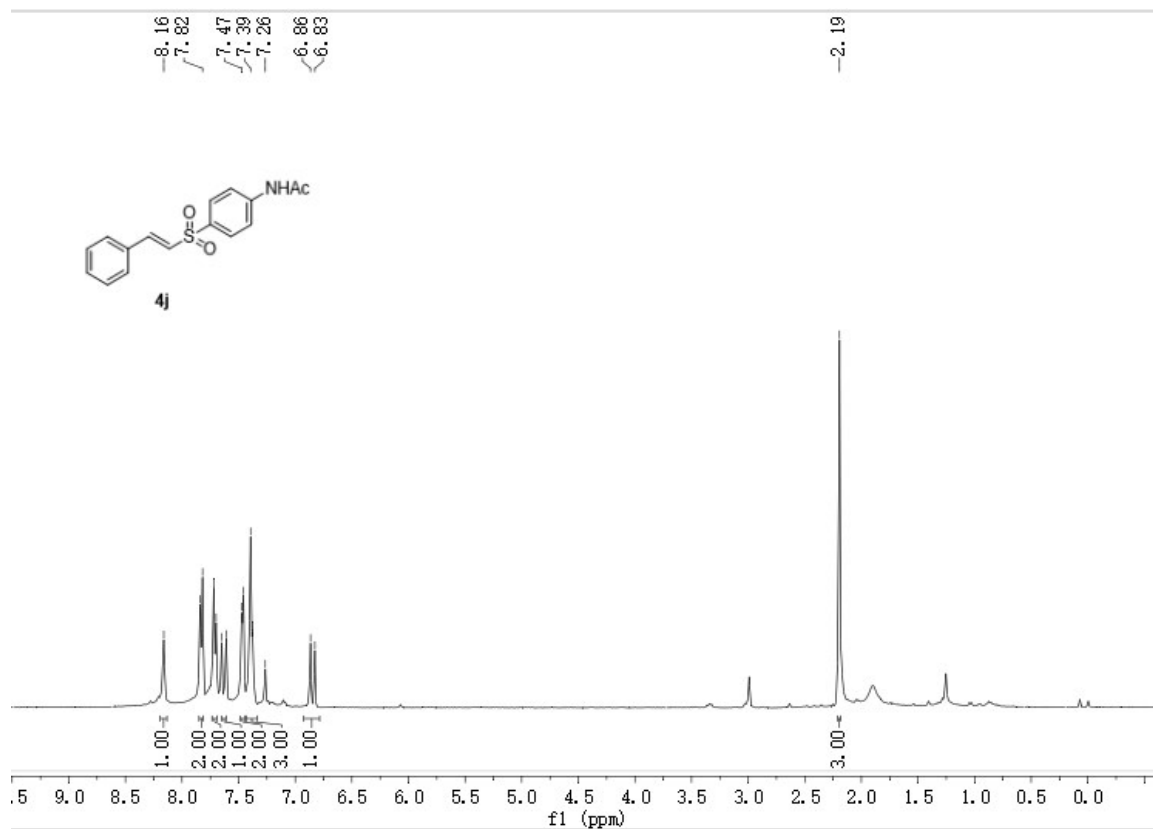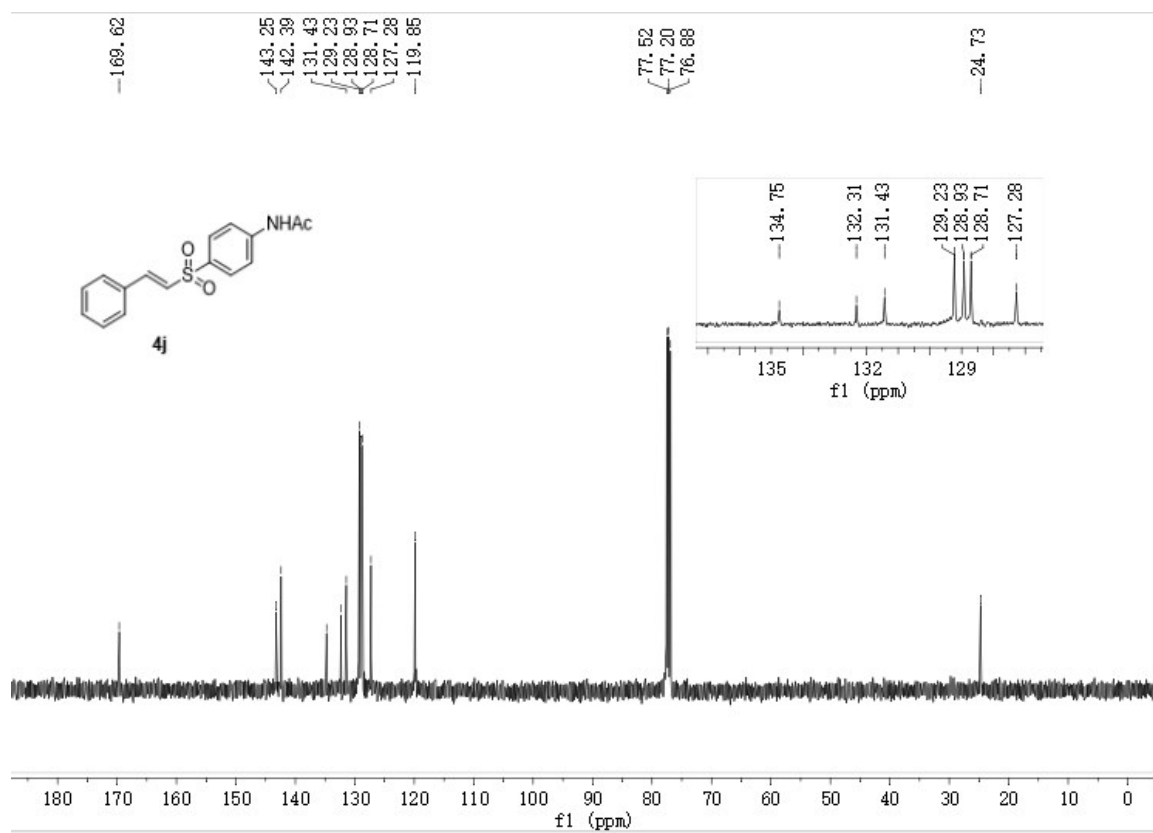

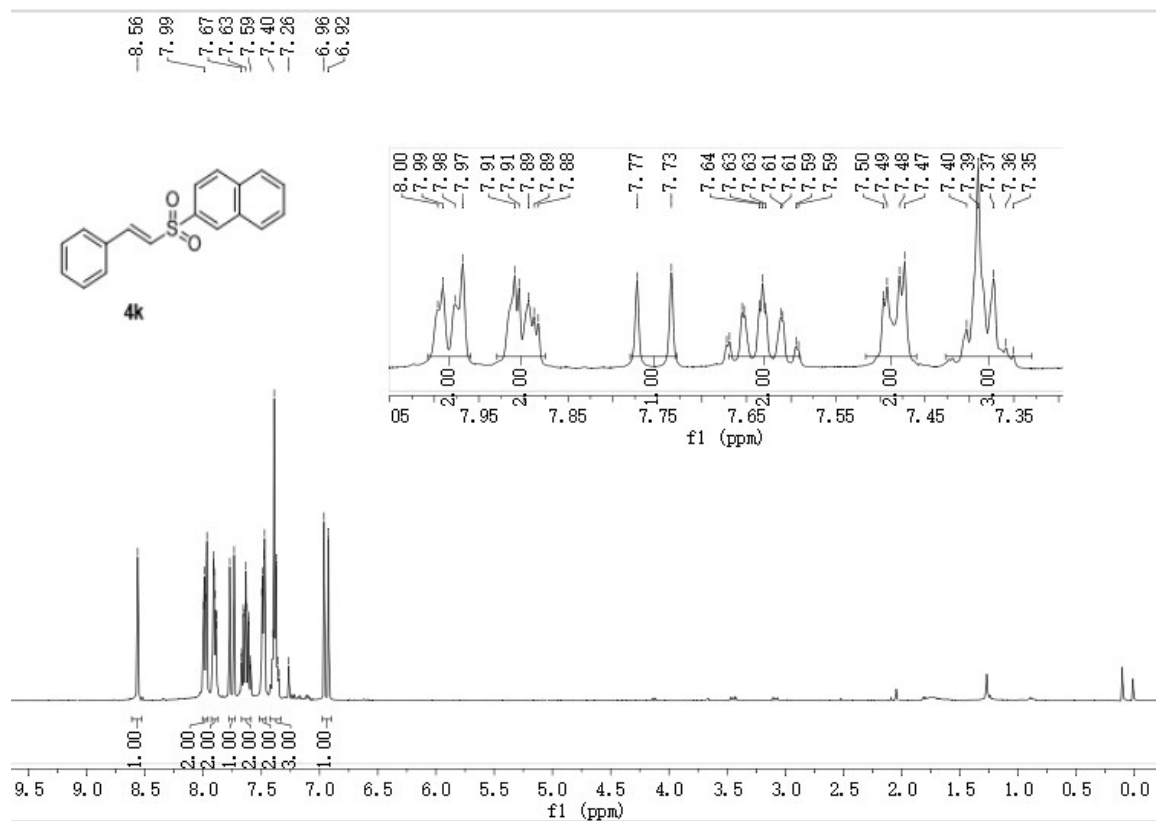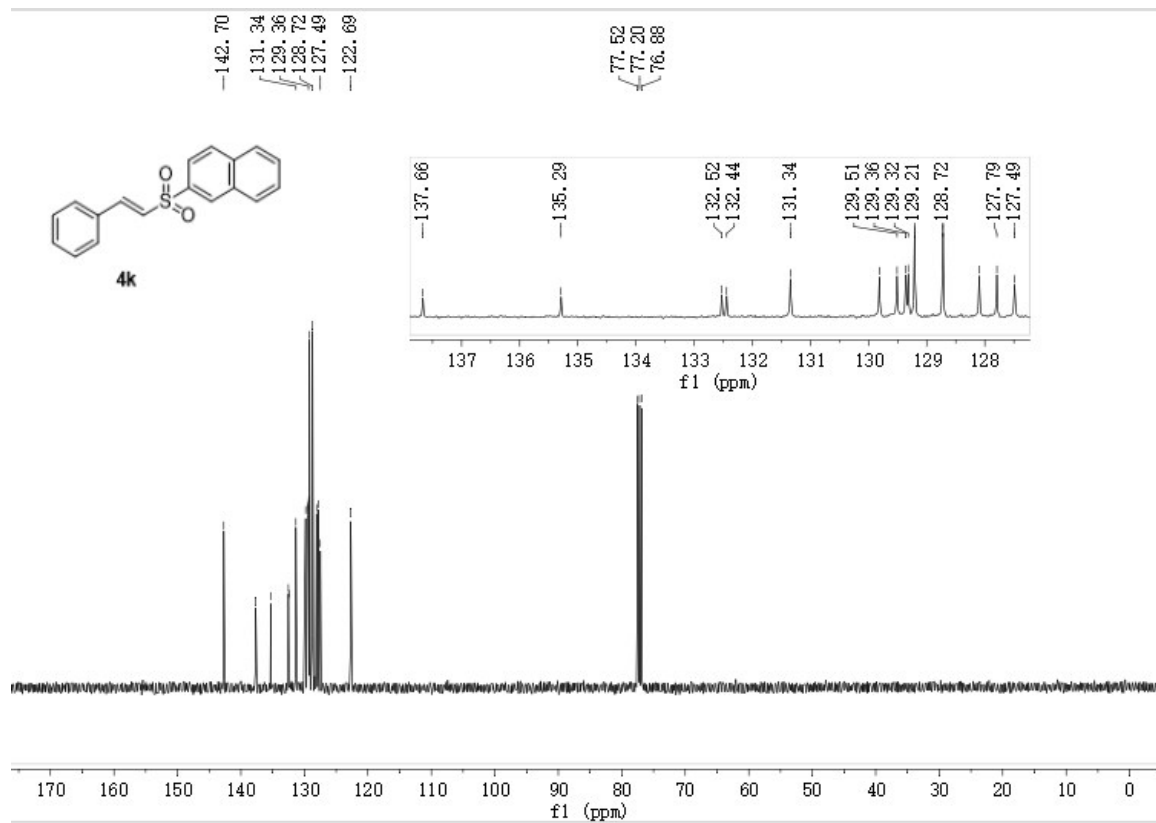

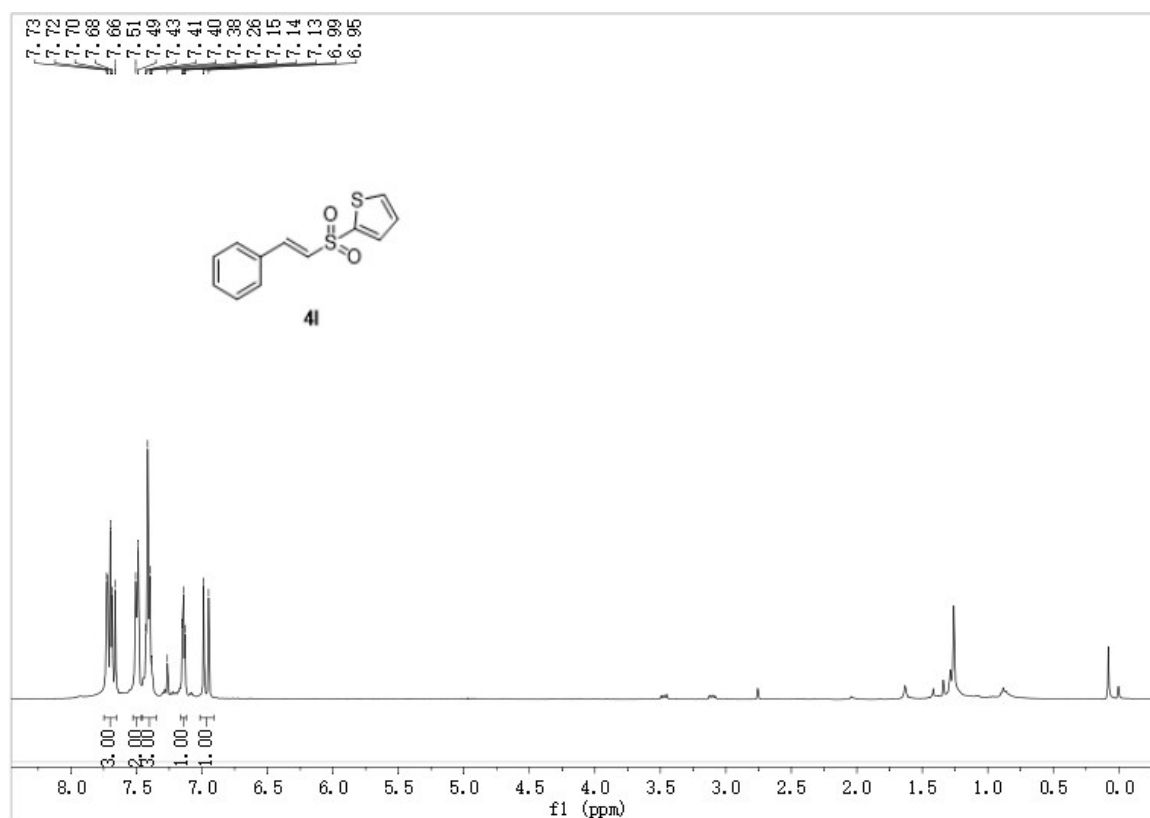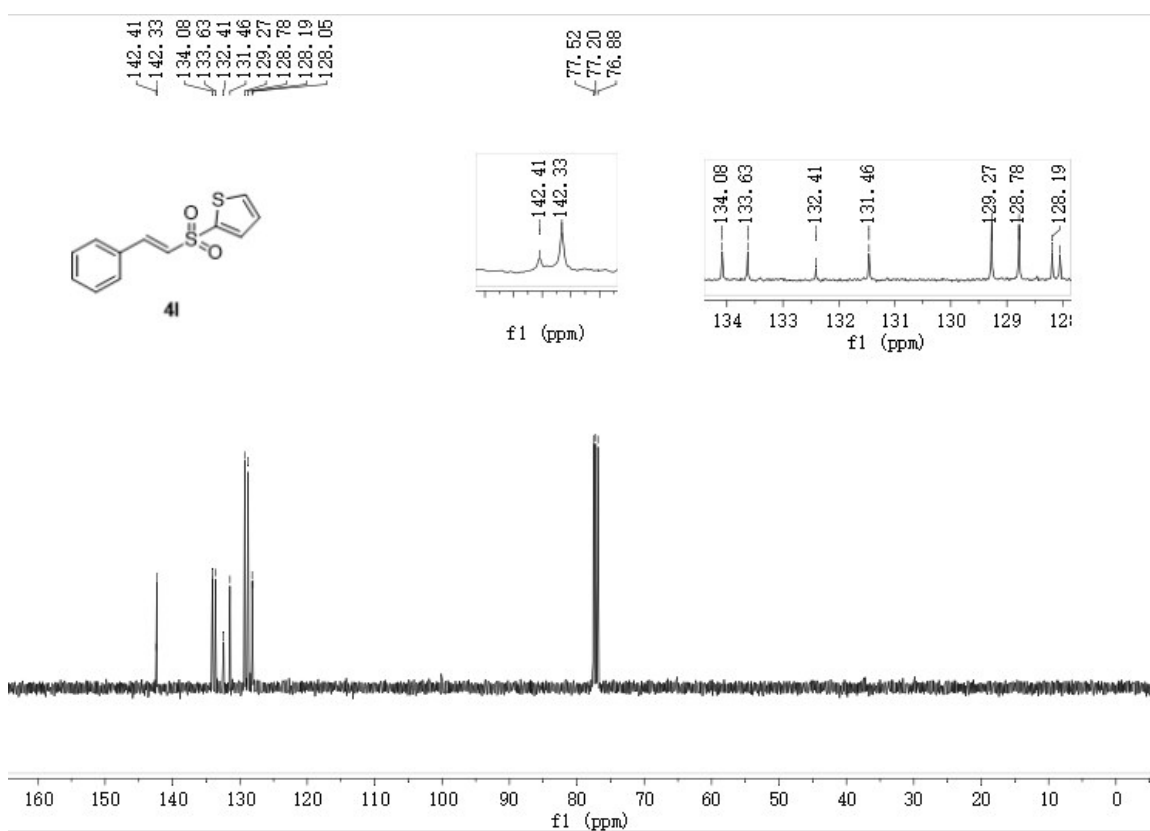

Supplement: d0ra07212e1.pdf [file d0ra07212e1.pdf]
